# Supplementary material
Source: publisher figshare collection journal article supplement (https://springernature.figshare.com/articles/dataset/_/5016083)
Supplement: Supplementary file 2 [file 1]

Code Enquêteur – Commune – Ar – Code PDV : [ ][ ][ ]-[ ][ ][ ]-[ ][ ][ ]-[ ][ ][ ]

## BENIN

### Section I : Informations de recensement

L'enquêteur doit remplir cette partie pour tous les points de vente.

|                                                                                                                                                                                                                                                                                                                                                                                                                                                                                                                                                                                                                                                                                                                                                                                                                                                                                                                                      |                              |                                               |
|--------------------------------------------------------------------------------------------------------------------------------------------------------------------------------------------------------------------------------------------------------------------------------------------------------------------------------------------------------------------------------------------------------------------------------------------------------------------------------------------------------------------------------------------------------------------------------------------------------------------------------------------------------------------------------------------------------------------------------------------------------------------------------------------------------------------------------------------------------------------------------------------------------------------------------------|------------------------------|-----------------------------------------------|
| Code Enquêteur – Commune – Ar – Code PDV [ ][ ][ ]-[ ][ ][ ]-[ ][ ][ ]-[ ][ ][ ]                                                                                                                                                                                                                                                                                                                                                                                                                                                                                                                                                                                                                                                                                                                                                                                                                                                     |                              |                                               |
| C1. Date d'aujourd'hui (jj/mm/aaaa)                                                                                                                                                                                                                                                                                                                                                                                                                                                                                                                                                                                                                                                                                                                                                                                                                                                                                                  |                              | [ ][ ][ ]-[ ][ ][ ]-[ 2 ][ 0 ][ 0 ][ 9 ][ ]   |
| C2. Nom de l'enquêteur<br>[ ]                                                                                                                                                                                                                                                                                                                                                                                                                                                                                                                                                                                                                                                                                                                                                                                                                                                                                                        | Informations sur l'enquêteur | C2a. Code de l'enquêteur<br>[ ][ ][ ][ ]      |
| C3. Commune<br>[ ]                                                                                                                                                                                                                                                                                                                                                                                                                                                                                                                                                                                                                                                                                                                                                                                                                                                                                                                   | Commune                      | C3a. Code de la commune<br>[ ][ ][ ][ ]       |
| C4. Arrondissement<br>[ ]                                                                                                                                                                                                                                                                                                                                                                                                                                                                                                                                                                                                                                                                                                                                                                                                                                                                                                            | Arrondissement               | C4a. Code de l'arrondissement<br>[ ][ ][ ][ ] |
| C5. Nom du PDV (s'il n'a pas de nom, inscrivez « sans nom » ou le nom des propriétaires)<br>[ ]                                                                                                                                                                                                                                                                                                                                                                                                                                                                                                                                                                                                                                                                                                                                                                                                                                      | Code PDV                     | C5a. Code du PDV<br>[ ][ ][ ][ ]              |
| C6. Le PDV se trouve-t-il dans une zone urbaine ou rurale ? (entourez une réponse ci-dessous)<br>0 = Urbaine      1 = Rurale                                                                                                                                                                                                                                                                                                                                                                                                                                                                                                                                                                                                                                                                                                                                                                                                         |                              |                                               |
| C7. Type de point de vente (Entourez une seule réponse)                                                                                                                                                                                                                                                                                                                                                                                                                                                                                                                                                                                                                                                                                                                                                                                                                                                                              |                              |                                               |
| <div> <div> 1. Formation sanitaire publique (Encerclez le type) <ul style="list-style-type: none"> <li>a. Centre National Hospitalier Universitaire</li> <li>b. Centre Hospitalier Départemental</li> <li>c. Hôpital de Zone</li> <li>d. Centre de santé communal</li> <li>e. Centre de santé d'arrondissement</li> <li>f. Dispensaire</li> <li>g. Maternité</li> <li>h. Unité villageoises de santé</li> </ul> </div> <div> 2. Clinique privée <ul style="list-style-type: none"> <li>3. Pharmacie (officiel)</li> <li>4. Dépôt pharmaceutique</li> <li>5. Supermarché / superette</li> <li>6. Boutique dans marché</li> <li>7. Boutique hors marché</li> <li>8. Étalage dans marché</li> <li>9. Étalage hors marché</li> <li>10. Vendeur ambulant</li> </ul> </div> <div> 11. ONG centre sanitaire <ul style="list-style-type: none"> <li>12. Hôpital missionnaire</li> <li>13. Autre (précisez):<br/>[ ]</li> </ul> </div> </div> |                              |                                               |
| C7b. Le point de vente fait-il partie de l'échantillon boosté?      1 = Oui      0 = Non                                                                                                                                                                                                                                                                                                                                                                                                                                                                                                                                                                                                                                                                                                                                                                                                                                             |                              |                                               |
| GPS : C8. Nord: Latitude      [ N ]-[ ][ ][ ]-[ ][ ][ ][ ][ ]                                                                                                                                                                                                                                                                                                                                                                                                                                                                                                                                                                                                                                                                                                                                                                                                                                                                        |                              |                                               |
| C9. Est : Longitude      [ E ]-[ ][ ][ ]-[ ][ ][ ][ ][ ]                                                                                                                                                                                                                                                                                                                                                                                                                                                                                                                                                                                                                                                                                                                                                                                                                                                                             |                              |                                               |

**C10. Nombre de visites**

|                                                                                                                                                                                                                                                        | Visite 1                       | Visite 2                       | Visite 3                       |
|--------------------------------------------------------------------------------------------------------------------------------------------------------------------------------------------------------------------------------------------------------|--------------------------------|--------------------------------|--------------------------------|
| Date                                                                                                                                                                                                                                                   | [ ][ ]-[ ][ ]-[0][9]           | [ ][ ]-[ ][ ]-[0][9]           | [ ][ ]-[ ][ ]-[0][9]           |
| <b>Résultat</b><br>1 = Terminé<br>2 = Entretien interrompu<br>3 = prestataire éligible non disponible<br>4 = Point de vente pas ouvert au moment donné<br>5 = Point de vente fermé<br>6 = Refus – si refus, <b>aller en C11</b><br>7 = Autres :<br>[ ] | [ ]                            | [ ]                            | [ ]                            |
| Heure du début de l'entretien<br>[ ][ ]:[ ][ ]<br>Heure de fin de l'entretien<br>[ ][ ]:[ ][ ]                                                                                                                                                         | [ ][ ]:[ ][ ]<br>[ ][ ]:[ ][ ] | [ ][ ]:[ ][ ]<br>[ ][ ]:[ ][ ] | [ ][ ]:[ ][ ]<br>[ ][ ]:[ ][ ] |

**REFUS :**

C11. Si le prestataire a refusé de répondre, pourquoi ? **(entourez une réponse et terminez l'entretien. Si le prestataire a une forte affluence de clients, demandez à quelle heure il préfère être interrogé, notez-le en C12 et revenez à l'heure prévue).**

1 = Affluence de clients

2 = Pense que c'est une inspection / a peur pour sa licence

3 = Pas intéressé

4 = Refuse de donner une raison

5 =Autre (*spécifiez*) [ ]

C12. Autres commentaires :

## Section II. Sélection et consentement

### L'enquêteur entre dans le point de vente.

S1. Observez les principaux articles en vente dans le point de vente **(Ne posez pas de questions, observez)**

- 1 = Médicaments
- 2 = Nourriture
- 3 = Produits de toilette
- 4 = Produits domestiques
- 5 = Recharges de téléphone mobile
- 6 = Cigarettes
- 7 = Autre (*spécifiez*): [\_\_\_\_\_]

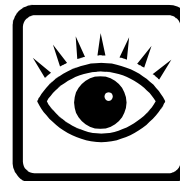

### Questions de sélection :

S2. Avez-vous des antipaludiques en stock aujourd'hui ? **(Entourez une réponse. Si nécessaire, donnez des noms d'antipaludiques connus.)**

1 = Oui                      Si oui, donnez des informations sur l'étude et obtenez son accord pour l'entretien. Commencez par la feuille d'audit : **Allez à la Q1**

0 = Non                      Si non, passez à la **question S3**

S3. Y a-t-il des antipaludiques qui sont épuisés aujourd'hui, mais que vous avez présentés à la vente ces **trois derniers mois** ? **(entourez une réponse).**

1 = Oui                      Si oui, donnez des informations sur l'étude et obtenez son accord pour l'entretien. **Allez à la Q13a**

0 = Non                      TERMINEZ L'ENTRETIEN (Retournez à la Question C10)

99 = Ne sait pas                      TERMINEZ L'ENTRETIEN (Retournez à la Question C10)

## III. Feuille d'Audit

Procédez à l'audit du médicament. Différentes feuilles d'audit du médicament seront utilisées pour décrire les informations de l'antipaludique selon la forme sous laquelle il se présente. Regardez en haut de chaque feuille pour voir de quel type il s'agit.

Si l'antipaludique se présente sous la forme de comprimés ou de suppositoires, utilisez-la :  
**'Fiche d'audit du médicament en comprimé et suppositoire'**

Si l'antipaludique est sous une autre forme que des comprimés ou suppositoires, utilisez la  
**'Fiche d'audit du médicament autre que comprimé'**

## FICHE D'AUDIT DU MÉDICAMENT EN COMPRIME ET SUPPOSITOIRE (A utiliser pour les médicaments vendus sous la forme de comprimés ou de suppositoires) Enq-Commune-Ar-PDV: [ ][ ]-[ ][ ]-[ ][ ]-[ ][ ]

|                                                                                                                                                                                                                                                                             |                                                                                                                                                                                                                                                                                                                                                                                                                                                                                                  |                                                                                                                                                   |                                                                                                                                                                                                                                                 |                                                                                                                                                                                                                                                               |                                                                                                                                                                                                                                                                                            |                                                                                                                                                                                                                                                                                                    |
|-----------------------------------------------------------------------------------------------------------------------------------------------------------------------------------------------------------------------------------------------------------------------------|--------------------------------------------------------------------------------------------------------------------------------------------------------------------------------------------------------------------------------------------------------------------------------------------------------------------------------------------------------------------------------------------------------------------------------------------------------------------------------------------------|---------------------------------------------------------------------------------------------------------------------------------------------------|-------------------------------------------------------------------------------------------------------------------------------------------------------------------------------------------------------------------------------------------------|---------------------------------------------------------------------------------------------------------------------------------------------------------------------------------------------------------------------------------------------------------------|--------------------------------------------------------------------------------------------------------------------------------------------------------------------------------------------------------------------------------------------------------------------------------------------|----------------------------------------------------------------------------------------------------------------------------------------------------------------------------------------------------------------------------------------------------------------------------------------------------|
| <b>1a. Nom générique</b><br><br>                                                                                                                                                                                                                                            | <b>2a. Dosage</b><br><div> <div> <div></div> <div></div> <div></div> </div> <div> <div></div> <div></div> <div></div> </div> <div> <div></div> <div></div> <div></div> </div> </div> <div> <div></div> <div></div> <div></div> </div>                                                                                                                                                                                                                                                            | <b>3a. Présentation</b><br><br>1 = Comprimé<br><br>2 = Suppositoire                                                                               | <b>4a. Nom de Marque</b><br><br>                                                                                                                                                                                                                | <b>5a. Fabricant</b><br><br>                                                                                                                                                                                                                                  | <b>6a. L'antipaludique est-il expiré?</b><br><br>1 = Oui<br><br>0 = Non<br><br>99 = Ne sait pas                                                                                                                                                                                            | <b>7a. Taille de l'emballage</b><br><i>(Complétez avec le nombre <b>et</b> encerclez le type)</i><br>Il y a un total de <div><div></div><div></div><div></div><div></div></div> comprimés ou suppositoires dans chaque <i>(encerclez le type de emballage)</i> :<br><br>1 = Boîte<br>2 = Plaquette |
|                                                                                                                                                                                                                                                                             | <div> <div> <div></div> <div></div> <div></div> </div> <div> <div></div> <div></div> <div></div> </div> <div> <div></div> <div></div> <div></div> </div> </div> <div> <div></div> <div></div> <div></div> </div>                                                                                                                                                                                                                                                                                 |                                                                                                                                                   |                                                                                                                                                                                                                                                 | <b>5aa. Pays de fabrication</b><br><br>                                                                                                                                                                                                                       |                                                                                                                                                                                                                                                                                            |                                                                                                                                                                                                                                                                                                    |
|                                                                                                                                                                                                                                                                             | <div> <div> <div></div> <div></div> <div></div> </div> <div> <div></div> <div></div> <div></div> </div> <div> <div></div> <div></div> <div></div> </div> </div> <div> <div></div> <div></div> <div></div> </div>                                                                                                                                                                                                                                                                                 |                                                                                                                                                   |                                                                                                                                                                                                                                                 |                                                                                                                                                                                                                                                               |                                                                                                                                                                                                                                                                                            |                                                                                                                                                                                                                                                                                                    |
| <b>8a. . Quantité en stock</b><br><i>(Ecrivez le nombre total des plaquettes ou boîtes décrits à la Question 7a)</i><br><br>Il y a <div><div></div><div></div><div></div><div></div><div></div></div> plaquettes ou boîtes d'antipaludiques en stock dans ce point de vente | <b>9a. Quantité vendue au cours des 7 derniers jours</b> <i>(Ecrivez le nombre de plaquettes ou boîtes décrits à la question 7a <b>OU</b> écrire le nombre total de comprimés vendus)</i><br><br>Ce point de vente a vendu <div><div></div><div></div><div></div><div></div></div> plaquettes / boîtes au cours des <u>7 derniers jours</u><br><br><b>OU</b><br>Ce point de vente a vendu <div><div></div><div></div><div></div><div></div></div> comprimés au cours des <u>7 derniers jours</u> | <b>10a. Avez-vous connu une rupture de stock de cet antipaludique au cours des 3 derniers mois?</b><br><br>1 = Oui<br>0 = Non<br>99 = Ne sait pas | <b>11a. Prix de vente au détail</b><br><br><div> <div></div> <div></div> </div> comprimés ou<br><br>suppositoires pour:<br><div> <div></div> <div></div> <div></div> <div></div> </div> FCFA<br><br><i>(Si gratuit écrire 00000 comme prix)</i> | <b>N1a. Prix de gros</b><br><i>Achat de gros le plus récent du point de vente :</i><br><div> <div></div> <div></div> <div></div> <div></div> </div> comprimés/suppositoires pour un coût de <div> <div></div> <div></div> <div></div> <div></div> </div> FCFA | <b>N1aa. Quantité de gros</b><br><i>Achat de gros le plus récent du point de vente :</i><br><div> <div></div> <div></div> <div></div> <div></div> </div> boîtes/plaquettes (comme décrits en Q7a) achetées<br>OU<br><div> <div></div> <div></div> <div></div> <div></div> </div> comprimés | <b>12a. Commentaires</b><br><br>                                                                                                                                                                                                                                                                   |

|                                                                                                                                                                                                                                                                        |                                                                                                                                                                                                                                                                                                                                                                                                                                                                                                                      |                                                                                                                                                          |                                                                                                                                                                                                                                                 |                                                                                                                                                                                                                                                               |                                                                                                                                                                                                                                                                                                   |                                                                                                                                                                                                                                                                                                        |
|------------------------------------------------------------------------------------------------------------------------------------------------------------------------------------------------------------------------------------------------------------------------|----------------------------------------------------------------------------------------------------------------------------------------------------------------------------------------------------------------------------------------------------------------------------------------------------------------------------------------------------------------------------------------------------------------------------------------------------------------------------------------------------------------------|----------------------------------------------------------------------------------------------------------------------------------------------------------|-------------------------------------------------------------------------------------------------------------------------------------------------------------------------------------------------------------------------------------------------|---------------------------------------------------------------------------------------------------------------------------------------------------------------------------------------------------------------------------------------------------------------|---------------------------------------------------------------------------------------------------------------------------------------------------------------------------------------------------------------------------------------------------------------------------------------------------|--------------------------------------------------------------------------------------------------------------------------------------------------------------------------------------------------------------------------------------------------------------------------------------------------------|
| <b>1b. Nom générique</b><br><br>                                                                                                                                                                                                                                       | <b>2b. Dosage</b><br><div> <div> <div></div> <div></div> <div></div> </div> <div> <div></div> <div></div> <div></div> </div> <div> <div></div> <div></div> <div></div> </div> </div> <div> <div></div> <div></div> <div></div> </div>                                                                                                                             | <b>3b. Présentation</b><br><br>1 = Comprimé<br><br>2 = Suppositoire                                                                                      | <b>4b. Nom de Marque</b><br><br>                                                                                                                                                                                                                | <b>5b. Fabricant</b><br><br><b>5bb. Pays de fabrication</b>                                                                                                                                                                                                   | <b>6b. L'antipaludique est-il expiré?</b><br><br>1 = Oui<br><br>0 = Non<br><br>99 = Ne sait pas                                                                                                                                                                                                   | <b>7b. Taille de l'Emballage</b><br><i>(Complétez avec le nombre <b>et</b> encerclez le type)</i><br>Il y a un total de <div> <div></div> <div></div> <div></div> <div></div> </div> comprimés ou suppositoires dans chaque <i>(encerclez le type de emballage):</i><br><br>1 = Boîte<br>2 = Plaquette |
| <b>8b. Quantité en stock</b><br><i>(Ecrivez le nombre total des plaquettes ou boîtes décrits à la <b>Question 7b</b>)</i><br>Il y a <div> <div></div> <div></div> <div></div> <div></div> </div> plaquettes ou boîtes d'antipaludiques en stock dans ce point de vente | <b>9b. Quantité vendue au cours des <u>7 derniers jours</u></b><br><i>(Ecrivez le nombre de plaquettes ou boîtes décrits à la question 7b <b>OU</b> écrire le nombre total de comprimés vendus)</i><br><br>Ce point de vente a vendu <div> <div></div> <div></div> <div></div> <div></div> </div> plaquettes / boîtes au cours des <u>7 derniers jours</u><br><br><b>OU</b><br>Ce point de vente a vendu <div> <div></div> <div></div> <div></div> <div></div> </div> comprimés au cours des <u>7 derniers jours</u> | <b>10b. Avez-vous connu une rupture de stock de cet antipaludique au cours des <u>3 derniers mois</u>?</b><br><br>1 = Oui<br>0 = Non<br>99 = Ne sait pas | <b>11b. Prix de vente au détail</b><br><br><div> <div></div> <div></div> </div> comprimés ou<br><br>suppositoires pour:<br><div> <div></div> <div></div> <div></div> <div></div> </div> FCFA<br><br><i>(Si gratuit écrire 00000 comme prix)</i> | <b>N1b. Prix de gros</b><br><i>Achat de gros le plus récent du point de vente :</i><br><div> <div></div> <div></div> <div></div> <div></div> </div> comprimés/suppositoires pour un coût de <div> <div></div> <div></div> <div></div> <div></div> </div> FCFA | <b>N1bb. Quantité de gros</b><br><i>Achat de gros le plus récent du point de vente :</i><br><div> <div></div> <div></div> <div></div> <div></div> </div> boîtes/plaquettes (comme décrits en Q7b) achetées<br><b>OU</b><br><div> <div></div> <div></div> <div></div> <div></div> </div> comprimés | <b>12b. Commentaires</b>                                                                                                                                                                                                                                                                               |

|                                                                                                                                                                                                              |                                                                                                                                                                                                                                                                                                                                                                                                     |                                                              |                                                                                                                                                    |                                                                                                                                                        |                                                                                                                                                    |                                                                                                                                                                                                                                   |                   |  |  |  |
|--------------------------------------------------------------------------------------------------------------------------------------------------------------------------------------------------------------|-----------------------------------------------------------------------------------------------------------------------------------------------------------------------------------------------------------------------------------------------------------------------------------------------------------------------------------------------------------------------------------------------------|--------------------------------------------------------------|----------------------------------------------------------------------------------------------------------------------------------------------------|--------------------------------------------------------------------------------------------------------------------------------------------------------|----------------------------------------------------------------------------------------------------------------------------------------------------|-----------------------------------------------------------------------------------------------------------------------------------------------------------------------------------------------------------------------------------|-------------------|--|--|--|
| 1c. Nom générique                                                                                                                                                                                            | 2c. Dosage<br>[ ][ ][ ][ ], [ ] mg                                                                                                                                                                                                                                                                                                                                                                  | 3c. Présentation<br><br>1 = Comprimé<br><br>2 = Suppositoire | 4c. Nom de Marque                                                                                                                                  | 5c. Fabricant                                                                                                                                          | 6c. L'antipaludique est-il expiré?<br><br>1 = Oui<br><br>0 = Non<br><br>99 = Ne sait pas                                                           | 7c. Taille de l'emballage<br>(Complétez avec le nombre <u>et</u> encerclez le type)<br>Il y a un total de [ ][ ][ ][ ] comprimés ou suppositoires dans chaque (encerclez le type de emballage):<br><br>1 = Boîte<br>2 = Plaquette |                   |  |  |  |
|                                                                                                                                                                                                              | [ ][ ][ ][ ], [ ] mg                                                                                                                                                                                                                                                                                                                                                                                |                                                              |                                                                                                                                                    | 5cc. Pays de fabrication                                                                                                                               |                                                                                                                                                    |                                                                                                                                                                                                                                   |                   |  |  |  |
|                                                                                                                                                                                                              | [ ][ ][ ][ ], [ ] mg                                                                                                                                                                                                                                                                                                                                                                                |                                                              |                                                                                                                                                    |                                                                                                                                                        |                                                                                                                                                    |                                                                                                                                                                                                                                   |                   |  |  |  |
| 8c. Quantité en stock<br>(Ecrivez le nombre total des plaquettes ou boîtes décrits à la <b>Question 7c</b> )<br>Il y a [ ][ ][ ][ ][ ] plaquettes ou boîtes d'antipaludiques en stock dans ce point de vente | 9c. Quantité vendue au cours des <b>7 derniers jours</b> (Ecrivez le nombre de plaquettes ou boîtes décrits à la question 7c <b>OU</b> écrire le nombre total de comprimés vendus)<br><br>Ce point de vente a vendu [ ][ ][ ][ ] plaquettes / boîtes au cours des <b>7 derniers jours</b><br><br><b>OU</b><br>Ce point de vente a vendu [ ][ ][ ][ ] comprimés au cours des <b>7 derniers jours</b> |                                                              | 10c. Avez-vous connu une rupture de stock de cet antipaludique au cours des <b>3 derniers mois</b> ?<br><br>1 = Oui<br>0 = Non<br>99 = Ne sait pas | 11c. Prix de vente au détail<br><br>[ ][ ] comprimés ou<br><br>suppositoires pour:<br>[ ][ ][ ][ ][ ] FCFA<br><br>(Si gratuit écrire 00000 comme prix) | N1c. Prix de gros<br>Achat de gros le plus récent du point de vente :<br>[ ][ ][ ][ ] comprimés/suppositoires pour un coût de [ ][ ][ ][ ][ ] FCFA | N1cc. Quantité de gros<br>Achat de gros le plus récent du point de vente :<br>[ ][ ][ ][ ][ ] boîtes/plaquettes (comme décrits en Q7c) achetées<br><b>OU</b><br>[ ][ ][ ][ ][ ] comprimés                                         | 12c. Commentaires |  |  |  |
|                                                                                                                                                                                                              |                                                                                                                                                                                                                                                                                                                                                                                                     |                                                              |                                                                                                                                                    |                                                                                                                                                        |                                                                                                                                                    |                                                                                                                                                                                                                                   |                   |  |  |  |









## FICHE D'AUDIT DU MÉDICAMENT EN COMPRIME ET SUPPOSITOIRE (A utiliser pour les médicaments vendus sous la forme de comprimés ou de suppositoires) Enq-Commune-Ar-PDV: [ ][ ]-[ ][ ]-[ ][ ]-[ ][ ]

|                                                                                                                                                                                                                    |                                                                                                                                                                                                                                                                                                                                                                                                     |                                                                                                                                                    |                                                                                                                                                     |                                                                                                                                                    |                                                                                                                                                                              |                                                                                                                                                                                                                                   |  |  |
|--------------------------------------------------------------------------------------------------------------------------------------------------------------------------------------------------------------------|-----------------------------------------------------------------------------------------------------------------------------------------------------------------------------------------------------------------------------------------------------------------------------------------------------------------------------------------------------------------------------------------------------|----------------------------------------------------------------------------------------------------------------------------------------------------|-----------------------------------------------------------------------------------------------------------------------------------------------------|----------------------------------------------------------------------------------------------------------------------------------------------------|------------------------------------------------------------------------------------------------------------------------------------------------------------------------------|-----------------------------------------------------------------------------------------------------------------------------------------------------------------------------------------------------------------------------------|--|--|
| 1a. Nom générique                                                                                                                                                                                                  | 2a. Dosage<br>[ ][ ][ ][ ], [ ] mg                                                                                                                                                                                                                                                                                                                                                                  | 3a. Présentation<br>1 = Comprimé<br>2 = Suppositoire                                                                                               | 4a. Nom de Marque                                                                                                                                   | 5a. Fabricant                                                                                                                                      | 6a. L'antipaludique est-il expiré?<br><br>1 = Oui<br><br>0 = Non<br><br>99 = Ne sait pas                                                                                     | 7a. Taille de l'emballage<br>(Complétez avec le nombre <u>et</u> encerclez le type)<br>Il y a un total de [ ][ ][ ][ ] comprimés ou suppositoires dans chaque (encerclez le type de emballage):<br><br>1 = Boîte<br>2 = Plaquette |  |  |
|                                                                                                                                                                                                                    | [ ][ ][ ][ ], [ ] mg                                                                                                                                                                                                                                                                                                                                                                                |                                                                                                                                                    |                                                                                                                                                     | 5aa. Pays de fabrication                                                                                                                           |                                                                                                                                                                              |                                                                                                                                                                                                                                   |  |  |
|                                                                                                                                                                                                                    | [ ][ ][ ][ ], [ ] mg                                                                                                                                                                                                                                                                                                                                                                                |                                                                                                                                                    |                                                                                                                                                     |                                                                                                                                                    |                                                                                                                                                                              |                                                                                                                                                                                                                                   |  |  |
| 8a. . Quantité en stock<br>(Écrivez le nombre total des plaquettes ou boîtes décrits à la <b>Question 7a</b> )<br><br>Il y a [ ][ ][ ][ ][ ] plaquettes ou boîtes d'antipaludiques en stock dans ce point de vente | 9a. Quantité vendue au cours des <b>7 derniers jours</b> (Écrivez le nombre de plaquettes ou boîtes décrits à la question 7a <b>OU</b> écrire le nombre total de comprimés vendus)<br><br>Ce point de vente a vendu [ ][ ][ ][ ] plaquettes / boîtes au cours des <b>7 derniers jours</b><br><br><b>OU</b><br>Ce point de vente a vendu [ ][ ][ ][ ] comprimés au cours des <b>7 derniers jours</b> | 10a. Avez-vous connu une rupture de stock de cet antipaludique au cours des <b>3 derniers mois</b> ?<br><br>1 = Oui<br>0 = Non<br>99 = Ne sait pas | 11a. Prix de vente au détail<br><br>[ ][ ] comprimés ou<br><br>suppositoires pour:<br>[ ][ ][ ][ ] FCFA<br><br>(Si gratuit écrire 00000 comme prix) | N1a. Prix de gros<br>Achat de gros le plus récent du point de vente :<br>[ ][ ][ ][ ] comprimés/suppositoires pour un coût de [ ][ ][ ][ ][ ] FCFA | N1aa. Quantité de gros<br>Achat de gros le plus récent du point de vente :<br>[ ][ ][ ][ ][ ] boîtes/plaquettes (comme décrits en Q7a) achetées OU [ ][ ][ ][ ][ ] comprimés | 12a. Commentaires                                                                                                                                                                                                                 |  |  |

|                                                                                                                                                                                                                                                                        |                                                                                                                                                                                                                                                                                                                                                                                                                                                                                                                      |                                                                                                                                                          |                                                                                                                                                                                                                                                 |                                                                                                                                                                                                                                                               |                                                                                                                                                                                                                                                                                                   |                                                                                                                                                                                                                                                                                                        |
|------------------------------------------------------------------------------------------------------------------------------------------------------------------------------------------------------------------------------------------------------------------------|----------------------------------------------------------------------------------------------------------------------------------------------------------------------------------------------------------------------------------------------------------------------------------------------------------------------------------------------------------------------------------------------------------------------------------------------------------------------------------------------------------------------|----------------------------------------------------------------------------------------------------------------------------------------------------------|-------------------------------------------------------------------------------------------------------------------------------------------------------------------------------------------------------------------------------------------------|---------------------------------------------------------------------------------------------------------------------------------------------------------------------------------------------------------------------------------------------------------------|---------------------------------------------------------------------------------------------------------------------------------------------------------------------------------------------------------------------------------------------------------------------------------------------------|--------------------------------------------------------------------------------------------------------------------------------------------------------------------------------------------------------------------------------------------------------------------------------------------------------|
| <b>1b. Nom générique</b>                                                                                                                                                                                                                                               | <b>2b. Dosage</b><br><div> <div> <div></div> <div></div> <div></div> </div> <div> <div></div> <div></div> <div></div> </div> <div> <div></div> <div></div> <div></div> </div> </div> <div> <div></div> <div></div> <div></div> </div>                                                                                                                             | <b>3b. Présentation</b><br><br>1 = Comprimé<br><br>2 = Suppositoire                                                                                      | <b>4b. Nom de Marque</b>                                                                                                                                                                                                                        | <b>5b. Fabricant</b><br><br><b>5bb. Pays de fabrication</b>                                                                                                                                                                                                   | <b>6b. L'antipaludique est-il expiré?</b><br><br>1 = Oui<br><br>0 = Non<br><br>99 = Ne sait pas                                                                                                                                                                                                   | <b>7b. Taille de l'Emballage</b><br><i>(Complétez avec le nombre <b>et</b> encerclez le type)</i><br>Il y a un total de <div> <div></div> <div></div> <div></div> <div></div> </div> comprimés ou suppositoires dans chaque <i>(encerclez le type de emballage):</i><br><br>1 = Boîte<br>2 = Plaquette |
| <b>8b. Quantité en stock</b><br><i>(Écrivez le nombre total des plaquettes ou boîtes décrits à la <b>Question 7b</b>)</i><br>Il y a <div> <div></div> <div></div> <div></div> <div></div> </div> plaquettes ou boîtes d'antipaludiques en stock dans ce point de vente | <b>9b. Quantité vendue au cours des <u>7 derniers jours</u></b><br><i>(Écrivez le nombre de plaquettes ou boîtes décrits à la question 7b <b>OU</b> écrire le nombre total de comprimés vendus)</i><br><br>Ce point de vente a vendu <div> <div></div> <div></div> <div></div> <div></div> </div> plaquettes / boîtes au cours des <u>7 derniers jours</u><br><br><b>OU</b><br>Ce point de vente a vendu <div> <div></div> <div></div> <div></div> <div></div> </div> comprimés au cours des <u>7 derniers jours</u> | <b>10b. Avez-vous connu une rupture de stock de cet antipaludique au cours des <u>3 derniers mois</u>?</b><br><br>1 = Oui<br>0 = Non<br>99 = Ne sait pas | <b>11b. Prix de vente au détail</b><br><br><div> <div></div> <div></div> </div> comprimés ou<br><br>suppositoires pour:<br><div> <div></div> <div></div> <div></div> <div></div> </div> FCFA<br><br><i>(Si gratuit écrire 00000 comme prix)</i> | <b>N1b. Prix de gros</b><br><i>Achat de gros le plus récent du point de vente :</i><br><div> <div></div> <div></div> <div></div> <div></div> </div> comprimés/suppositoires pour un coût de <div> <div></div> <div></div> <div></div> <div></div> </div> FCFA | <b>N1bb. Quantité de gros</b><br><i>Achat de gros le plus récent du point de vente :</i><br><div> <div></div> <div></div> <div></div> <div></div> </div> boîtes/plaquettes (comme décrits en Q7b) achetées<br><b>OU</b><br><div> <div></div> <div></div> <div></div> <div></div> </div> comprimés | <b>12b. Commentaires</b>                                                                                                                                                                                                                                                                               |

|                                                                                                                                                                                                              |                                                                                                                                                                                                                                                                                                                                                                                                     |                                                                                                                                                    |                                                                                                                                                        |                                                                                                                                                    |                                                                                                                                                                                     |                                                                                                                                                                                                                                   |
|--------------------------------------------------------------------------------------------------------------------------------------------------------------------------------------------------------------|-----------------------------------------------------------------------------------------------------------------------------------------------------------------------------------------------------------------------------------------------------------------------------------------------------------------------------------------------------------------------------------------------------|----------------------------------------------------------------------------------------------------------------------------------------------------|--------------------------------------------------------------------------------------------------------------------------------------------------------|----------------------------------------------------------------------------------------------------------------------------------------------------|-------------------------------------------------------------------------------------------------------------------------------------------------------------------------------------|-----------------------------------------------------------------------------------------------------------------------------------------------------------------------------------------------------------------------------------|
| 1c. Nom générique                                                                                                                                                                                            | 2c. Dosage<br>[ ][ ][ ][ ] , [ ] mg                                                                                                                                                                                                                                                                                                                                                                 | 3c. Présentation<br>1 = Comprimé<br>2 = Suppositoire                                                                                               | 4c. Nom de Marque                                                                                                                                      | 5c. Fabricant<br><br>5cc. Pays de fabrication                                                                                                      | 6c. L'antipaludique est-il expiré?<br><br>1 = Oui<br><br>0 = Non<br><br>99 = Ne sait pas                                                                                            | 7c. Taille de l'emballage<br>(Complétez avec le nombre <b>et</b> encerclez le type)<br>Il y a un total de [ ][ ][ ][ ] comprimés ou suppositoires dans chaque (encerclez le type de emballage):<br><br>1 = Boîte<br>2 = Plaquette |
| 8c. Quantité en stock<br>(Écrivez le nombre total des plaquettes ou boîtes décrits à la <b>Question 7c</b> )<br>Il y a [ ][ ][ ][ ][ ] plaquettes ou boîtes d'antipaludiques en stock dans ce point de vente | 9c. Quantité vendue au cours des <b>7 derniers jours</b> (Écrivez le nombre de plaquettes ou boîtes décrits à la question 7c <b>OU</b> écrire le nombre total de comprimés vendus)<br><br>Ce point de vente a vendu [ ][ ][ ][ ] plaquettes / boîtes au cours des <b>7 derniers jours</b><br><br><b>OU</b><br>Ce point de vente a vendu [ ][ ][ ][ ] comprimés au cours des <b>7 derniers jours</b> | 10c. Avez-vous connu une rupture de stock de cet antipaludique au cours des <b>3 derniers mois</b> ?<br><br>1 = Oui<br>0 = Non<br>99 = Ne sait pas | 11c. Prix de vente au détail<br><br>[ ][ ] comprimés ou<br><br>suppositoires pour:<br>[ ][ ][ ][ ][ ] FCFA<br><br>(Si gratuit écrire 00000 comme prix) | N1c. Prix de gros<br>Achat de gros le plus récent du point de vente :<br>[ ][ ][ ][ ] comprimés/suppositoires pour un coût de [ ][ ][ ][ ][ ] FCFA | N1cc. Quantité de gros<br>Achat de gros le plus récent du point de vente :<br>[ ][ ][ ][ ][ ] boîtes/plaquettes (comme décrits en Q7c) achetées <b>OU</b> [ ][ ][ ][ ][ ] comprimés | 12c. Commentaires                                                                                                                                                                                                                 |

## FICHE D'AUDIT DU MÉDICAMENT EN COMPRIME ET SUPPOSITOIRE (A utiliser pour les médicaments vendus sous la forme de comprimés ou de suppositoires) Enq-Commune-Ar-PDV: [ ][ ]-[ ][ ]-[ ][ ]-[ ][ ]

|                                                                                                                                                                                                                    |                                  |                                                                                                                                                                                                                                                                                                                                                                                                     |                   |                                                                                                                                                    |                                                                                                                                                  |                                                                                                                                                                                                                                 |                                                                                                                                                                           |                   |  |  |
|--------------------------------------------------------------------------------------------------------------------------------------------------------------------------------------------------------------------|----------------------------------|-----------------------------------------------------------------------------------------------------------------------------------------------------------------------------------------------------------------------------------------------------------------------------------------------------------------------------------------------------------------------------------------------------|-------------------|----------------------------------------------------------------------------------------------------------------------------------------------------|--------------------------------------------------------------------------------------------------------------------------------------------------|---------------------------------------------------------------------------------------------------------------------------------------------------------------------------------------------------------------------------------|---------------------------------------------------------------------------------------------------------------------------------------------------------------------------|-------------------|--|--|
| 1a. Nom générique                                                                                                                                                                                                  | 2a. Dosage<br>[ ][ ][ ] , [ ] mg | 3a. Présentation<br><br>1 = Comprimé<br><br>2 = Suppositoire                                                                                                                                                                                                                                                                                                                                        | 4a. Nom de Marque | 5a. Fabricant                                                                                                                                      | 6a. L'antipaludique est-il expiré?<br><br>1 = Oui<br><br>0 = Non<br><br>99 = Ne sait pas                                                         | 7a. Taille de l'emballage<br>(Complétez avec le nombre <u>et</u> encerclez le type)<br>Il y a un total de [ ][ ][ ] comprimés ou suppositoires dans chaque (encerclez le type de emballage):<br><br>1 = Boîte<br>2 = Plaqueette |                                                                                                                                                                           |                   |  |  |
|                                                                                                                                                                                                                    | [ ][ ][ ] , [ ] mg               |                                                                                                                                                                                                                                                                                                                                                                                                     |                   | 5aa. Pays de fabrication                                                                                                                           |                                                                                                                                                  |                                                                                                                                                                                                                                 |                                                                                                                                                                           |                   |  |  |
|                                                                                                                                                                                                                    | [ ][ ][ ] , [ ] mg               |                                                                                                                                                                                                                                                                                                                                                                                                     |                   |                                                                                                                                                    |                                                                                                                                                  |                                                                                                                                                                                                                                 |                                                                                                                                                                           |                   |  |  |
| 8a. . Quantité en stock<br>(Écrivez le nombre total des plaquettes ou boîtes décrits à la <b>Question 7a</b> )<br><br>Il y a [ ][ ][ ][ ][ ] plaquettes ou boîtes d'antipaludiques en stock dans ce point de vente |                                  | 9a. Quantité vendue au cours des <u>7 derniers jours</u> (Écrivez le nombre de plaquettes ou boîtes décrits à la question 7a <b>OU</b> écrire le nombre total de comprimés vendus)<br><br>Ce point de vente a vendu [ ][ ][ ][ ] plaquettes / boîtes au cours des <u>7 derniers jours</u><br><br><b>OU</b><br>Ce point de vente a vendu [ ][ ][ ][ ] comprimés au cours des <u>7 derniers jours</u> |                   | 10a. Avez-vous connu une rupture de stock de cet antipaludique au cours des <u>3 derniers mois</u> ?<br><br>1 = Oui<br>0 = Non<br>99 = Ne sait pas | 11a. Prix de vente au détail<br><br>[ ][ ] comprimés ou<br><br>suppositoires pour: [ ][ ][ ][ ] FCFA<br><br>(Si gratuit écrire 00000 comme prix) | N1a. Prix de gros<br>Achat de gros le plus récent du point de vente :<br>[ ][ ][ ] comprimés/suppositoires pour un coût de [ ][ ][ ][ ][ ] FCFA                                                                                 | N1aa. Quantité de gros<br>Achat de gros le plus récent du point de vente :<br>[ ][ ][ ][ ] boîtes/plaquettes (comme décrits en Q7a) achetées OU [ ][ ][ ][ ][ ] comprimés | 12a. Commentaires |  |  |

|                                                                                                                                                                                                      |                                                                                                                                                                                                                                                                                                                                                                                                           |                                                                                                                                                    |                                                                                                                                                        |                                                                                                                                                          |                                                                                                                                                                                    |                                                                                                                                                                                                                                    |
|------------------------------------------------------------------------------------------------------------------------------------------------------------------------------------------------------|-----------------------------------------------------------------------------------------------------------------------------------------------------------------------------------------------------------------------------------------------------------------------------------------------------------------------------------------------------------------------------------------------------------|----------------------------------------------------------------------------------------------------------------------------------------------------|--------------------------------------------------------------------------------------------------------------------------------------------------------|----------------------------------------------------------------------------------------------------------------------------------------------------------|------------------------------------------------------------------------------------------------------------------------------------------------------------------------------------|------------------------------------------------------------------------------------------------------------------------------------------------------------------------------------------------------------------------------------|
| 1b. Nom générique                                                                                                                                                                                    | 2b. Dosage<br>[ ][ ][ ][ ] , [ ] mg<br>[ ][ ][ ][ ] , [ ] mg<br>[ ][ ][ ][ ] , [ ] mg                                                                                                                                                                                                                                                                                                                     | 3b. Présentation<br>1 = Comprimé<br>2 = Suppositoire                                                                                               | 4b. Nom de Marque                                                                                                                                      | 5b. Fabricant<br><br>5bb. Pays de fabrication                                                                                                            | 6b. L'antipaludique est-il expiré?<br><br>1 = Oui<br><br>0 = Non<br><br>99 = Ne sait pas                                                                                           | 7b. Taille de l'Emballage<br>(Complétez avec le nombre <u>et</u> encerclez le type)<br>Il y a un total de [ ][ ][ ][ ] comprimés ou suppositoires dans chaque (encerclez le type de emballage):<br><br>1 = Boîte<br>2 = Plaqueette |
| 8b. Quantité en stock<br>(Écrivez le nombre total des plaquettes ou boîtes décrits à la Question 7b)<br>Il y a [ ][ ][ ][ ][ ] plaquettes ou boîtes d'antipaludiques en stock dans ce point de vente | 9b. Quantité vendue au cours des <u>7 derniers jours</u> (Écrivez le nombre de plaquettes ou boîtes décrits à la question 7b <b>OU</b> écrive le nombre total de comprimés vendus)<br><br>Ce point de vente a vendu [ ][ ][ ][ ][ ] plaquettes / boîtes au cours des <u>7 derniers jours</u><br><br><b>OU</b><br>Ce point de vente a vendu [ ][ ][ ][ ][ ] comprimés au cours des <u>7 derniers jours</u> | 10b. Avez-vous connu une rupture de stock de cet antipaludique au cours des <u>3 derniers mois</u> ?<br><br>1 = Oui<br>0 = Non<br>99 = Ne sait pas | 11b. Prix de vente au détail<br><br>[ ][ ] comprimés ou<br><br>suppositoires pour:<br>[ ][ ][ ][ ][ ] FCFA<br><br>(Si gratuit écrive 00000 comme prix) | N1b. Prix de gros<br>Achat de gros le plus récent du point de vente :<br>[ ][ ][ ][ ][ ] comprimés/suppositoires pour un coût de [ ][ ][ ][ ][ ][ ] FCFA | N1bb. Quantité de gros<br>Achat de gros le plus récent du point de vente :<br>[ ][ ][ ][ ][ ][ ] boites/plaquettes (comme décrits en Q7b) achetées OU [ ][ ][ ][ ][ ][ ] comprimés | 12b. Commentaires                                                                                                                                                                                                                  |

|                                                                                                                                                                                                           |                                                                                                                                                                                                                                                                                                                                                                                                     |                                                              |                                                                                                                                                    |                                                                                                                                                     |                                                                                                                                                    |                                                                                                                                                                                                                                 |                   |
|-----------------------------------------------------------------------------------------------------------------------------------------------------------------------------------------------------------|-----------------------------------------------------------------------------------------------------------------------------------------------------------------------------------------------------------------------------------------------------------------------------------------------------------------------------------------------------------------------------------------------------|--------------------------------------------------------------|----------------------------------------------------------------------------------------------------------------------------------------------------|-----------------------------------------------------------------------------------------------------------------------------------------------------|----------------------------------------------------------------------------------------------------------------------------------------------------|---------------------------------------------------------------------------------------------------------------------------------------------------------------------------------------------------------------------------------|-------------------|
| 1c. Nom générique                                                                                                                                                                                         | 2c. Dosage<br>[ ][ ][ ] , [ ] mg                                                                                                                                                                                                                                                                                                                                                                    | 3c. Présentation<br><br>1 = Comprimé<br><br>2 = Suppositoire | 4c. Nom de Marque                                                                                                                                  | 5c. Fabricant                                                                                                                                       | 6c. L'antipaludique est-il expiré?<br><br>1 = Oui<br><br>0 = Non<br><br>99 = Ne sait pas                                                           | 7c. Taille de l'emballage<br>(Complétez avec le nombre <u>et</u> encerclez le type)<br>Il y a un total de [ ][ ][ ] comprimés ou suppositoires dans chaque (encerclez le type de emballage):<br><br>1 = Boîte<br>2 = Plaqueette |                   |
|                                                                                                                                                                                                           | [ ][ ][ ] , [ ] mg                                                                                                                                                                                                                                                                                                                                                                                  |                                                              |                                                                                                                                                    | 5cc. Pays de fabrication                                                                                                                            |                                                                                                                                                    |                                                                                                                                                                                                                                 |                   |
|                                                                                                                                                                                                           | [ ][ ][ ] , [ ] mg                                                                                                                                                                                                                                                                                                                                                                                  |                                                              |                                                                                                                                                    |                                                                                                                                                     |                                                                                                                                                    |                                                                                                                                                                                                                                 |                   |
| 8c. Quantité en stock<br>(Écrivez le nombre total des plaquettes ou boîtes décrits à la <b>Question 7c</b> )<br>Il y a [ ][ ][ ][ ] plaquettes ou boîtes d'antipaludiques en stock dans ce point de vente | 9c. Quantité vendue au cours des <b>7 derniers jours</b> (Écrivez le nombre de plaquettes ou boîtes décrits à la question 7c <b>OU</b> écrire le nombre total de comprimés vendus)<br><br>Ce point de vente a vendu [ ][ ][ ][ ] plaquettes / boîtes au cours des <b>7 derniers jours</b><br><br><b>OU</b><br>Ce point de vente a vendu [ ][ ][ ][ ] comprimés au cours des <b>7 derniers jours</b> |                                                              | 10c. Avez-vous connu une rupture de stock de cet antipaludique au cours des <b>3 derniers mois</b> ?<br><br>1 = Oui<br>0 = Non<br>99 = Ne sait pas | 11c. Prix de vente au détail<br><br>[ ][ ] comprimés ou<br><br>suppositoires pour:<br>[ ][ ][ ][ ] FCFA<br><br>(Si gratuit écrire 00000 comme prix) | N1c. Prix de gros<br>Achat de gros le plus récent du point de vente :<br>[ ][ ][ ][ ] comprimés/suppositoires pour un coût de [ ][ ][ ][ ][ ] FCFA | N1cc. Quantité de gros<br>Achat de gros le plus récent du point de vente :<br>[ ][ ][ ][ ][ ] boites/plaquettes (comme décrits en Q7c) achetées<br>OU<br>[ ][ ][ ][ ][ ] comprimés                                              | 12c. Commentaires |

FICHE D'AUDIT DU MÉDICAMENT EN COMPRIME ET SUPPOSITOIRE (A utiliser pour les médicaments vendus sous la forme de comprimés ou de suppositoires) Eng-Commune-Ar-PDV: [ ]-[ ]-[ ]-[ ]

|                                                                                                                                                                                                               |                                                                                                                                                                                                                                                                                                                                                                        |                                                                                                                                            |                                                                                                                                                 |                                                                                                                                                          |                                                                                                                                                                                    |                                                                                                                                                                                                                                   |
|---------------------------------------------------------------------------------------------------------------------------------------------------------------------------------------------------------------|------------------------------------------------------------------------------------------------------------------------------------------------------------------------------------------------------------------------------------------------------------------------------------------------------------------------------------------------------------------------|--------------------------------------------------------------------------------------------------------------------------------------------|-------------------------------------------------------------------------------------------------------------------------------------------------|----------------------------------------------------------------------------------------------------------------------------------------------------------|------------------------------------------------------------------------------------------------------------------------------------------------------------------------------------|-----------------------------------------------------------------------------------------------------------------------------------------------------------------------------------------------------------------------------------|
| 1a. Nom générique                                                                                                                                                                                             | 2a. Dosage<br>[ ][ ][ ][ ] , [ ][ ] mg<br>[ ][ ][ ][ ] , [ ][ ] mg<br>[ ][ ][ ][ ] , [ ][ ] mg                                                                                                                                                                                                                                                                         | 3a. Présentation<br>1 = Comprimé<br>2 = Suppositoire                                                                                       | 4a. Nom de Marque                                                                                                                               | 5a. Fabricant<br><br>5aa. Pays de fabrication                                                                                                            | 6a. L'antipaludique est-il expiré?<br><br>1 = Oui<br><br>0 = Non<br><br>99 = Ne sait pas                                                                                           | 7a. Taille de l'emballage<br>(Complétez avec le nombre <u>et</u> encerclez le type)<br>Il y a un total de [ ][ ][ ][ ] comprimés ou suppositoires dans chaque (encerclez le type de emballage):<br><br>1 = Boîte<br>2 = Plaquette |
| 8a. . Quantité en stock<br>(Écrivez le nombre total des plaquettes ou boîtes décrits à la Question 7a)<br><br>Il y a [ ][ ][ ][ ][ ][ ] plaquettes ou boîtes d'antipaludiques en stock dans ce point de vente | 9a. Quantité vendue au cours des 7 derniers jours (Écrivez le nombre de plaquettes ou boîtes décrits à la question 7a OU écrire le nombre total de comprimés vendus)<br><br>Ce point de vente a vendu [ ][ ][ ][ ][ ] plaquettes / boîtes au cours des 7 derniers jours<br><br>OU<br>Ce point de vente a vendu [ ][ ][ ][ ][ ] comprimés au cours des 7 derniers jours | 10a. Avez-vous connu une rupture de stock de cet antipaludique au cours des 3 derniers mois?<br><br>1 = Oui<br>0 = Non<br>99 = Ne sait pas | 11a. Prix de vente au détail<br><br>[ ][ ][ ] comprimés ou suppositoires pour: [ ][ ][ ][ ][ ] FCFA<br><br>(Si gratuit écrire 00000 comme prix) | N1a. Prix de gros<br>Achat de gros le plus récent du point de vente :<br>[ ][ ][ ][ ][ ] comprimés/suppositoires pour un coût de [ ][ ][ ][ ][ ][ ] FCFA | N1aa. Quantité de gros<br>Achat de gros le plus récent du point de vente :<br>[ ][ ][ ][ ][ ][ ] boites/plaquettes (comme décrits en Q7a) achetées OU [ ][ ][ ][ ][ ][ ] comprimés | 12a. Commentaires                                                                                                                                                                                                                 |

|                                                                                                                                                                                                                 |                                                                                                                                                                                                                                                                                                                                                                                                           |                                                                                                                                                    |                                                                                                                                                 |                                                                                                                                                          |                                                                                                                                                                                    |                                                                                                                                                                                                                                   |
|-----------------------------------------------------------------------------------------------------------------------------------------------------------------------------------------------------------------|-----------------------------------------------------------------------------------------------------------------------------------------------------------------------------------------------------------------------------------------------------------------------------------------------------------------------------------------------------------------------------------------------------------|----------------------------------------------------------------------------------------------------------------------------------------------------|-------------------------------------------------------------------------------------------------------------------------------------------------|----------------------------------------------------------------------------------------------------------------------------------------------------------|------------------------------------------------------------------------------------------------------------------------------------------------------------------------------------|-----------------------------------------------------------------------------------------------------------------------------------------------------------------------------------------------------------------------------------|
| 1b. Nom générique                                                                                                                                                                                               | 2b. Dosage<br>[ ][ ][ ][ ] , [ ][ ] mg                                                                                                                                                                                                                                                                                                                                                                    | 3b. Présentation<br>1 = Comprimé<br>2 = Suppositoire                                                                                               | 4b. Nom de Marque                                                                                                                               | 5b. Fabricant<br><br>5bb. Pays de fabrication                                                                                                            | 6b. L'antipaludique est-il expiré?<br><br>1 = Oui<br><br>0 = Non<br><br>99 = Ne sait pas                                                                                           | 7b. Taille de l'Emballage<br>(Complétez avec le nombre <u>et</u> encerclez le type)<br>Il y a un total de [ ][ ][ ][ ] comprimés ou suppositoires dans chaque (encerclez le type de emballage):<br><br>1 = Boîte<br>2 = Plaquette |
| 8b. Quantité en stock<br>(Ecrivez le nombre total des plaquettes ou boîtes décrits à la <b>Question 7b</b> )<br>Il y a [ ][ ][ ][ ][ ][ ] plaquettes ou boîtes d'antipaludiques en stock dans ce point de vente | 9b. Quantité vendue au cours des <u>7 derniers jours</u> (Écrivez le nombre de plaquettes ou boîtes décrits à la question 7b <b>OU</b> écrire le nombre total de comprimés vendus)<br><br>Ce point de vente a vendu [ ][ ][ ][ ][ ] plaquettes / boîtes au cours des <u>7 derniers jours</u><br><br><b>OU</b><br>Ce point de vente a vendu [ ][ ][ ][ ][ ] comprimés au cours des <u>7 derniers jours</u> | 10b. Avez-vous connu une rupture de stock de cet antipaludique au cours des <u>3 derniers mois</u> ?<br><br>1 = Oui<br>0 = Non<br>99 = Ne sait pas | 11b. Prix de vente au détail<br><br>[ ][ ][ ] comprimés ou suppositoires pour: [ ][ ][ ][ ][ ] FCFA<br><br>(Si gratuit écrire 00000 comme prix) | N1b. Prix de gros<br>Achat de gros le plus récent du point de vente :<br>[ ][ ][ ][ ][ ] comprimés/suppositoires pour un coût de [ ][ ][ ][ ][ ][ ] FCFA | N1bb. Quantité de gros<br>Achat de gros le plus récent du point de vente :<br>[ ][ ][ ][ ][ ][ ] boites/plaquettes (comme décrits en Q7b) achetées OU [ ][ ][ ][ ][ ][ ] comprimés | 12b. Commentaires                                                                                                                                                                                                                 |

|                                                                                                                                                                                                                 |                                                                                                                                                                                                                                                                                                                                                                                                    |                                                                                                                                                    |                                                                                                                                                 |                                                                                                                                                          |                                                                                                                                                                                    |                                                                                                                                                                                                                                   |
|-----------------------------------------------------------------------------------------------------------------------------------------------------------------------------------------------------------------|----------------------------------------------------------------------------------------------------------------------------------------------------------------------------------------------------------------------------------------------------------------------------------------------------------------------------------------------------------------------------------------------------|----------------------------------------------------------------------------------------------------------------------------------------------------|-------------------------------------------------------------------------------------------------------------------------------------------------|----------------------------------------------------------------------------------------------------------------------------------------------------------|------------------------------------------------------------------------------------------------------------------------------------------------------------------------------------|-----------------------------------------------------------------------------------------------------------------------------------------------------------------------------------------------------------------------------------|
| 1c. Nom générique                                                                                                                                                                                               | 2c. Dosage<br>[ ][ ][ ][ ] , [ ][ ] mg<br><br>[ ][ ][ ][ ] , [ ][ ] mg<br><br>[ ][ ][ ][ ] , [ ][ ] mg                                                                                                                                                                                                                                                                                             | 3c. Présentation<br><br>1 = Comprimé<br><br>2 = Suppositoire                                                                                       | 4c. Nom de Marque                                                                                                                               | 5c. Fabricant<br><br>5cc. Pays de fabrication                                                                                                            | 6c. L'antipaludique est-il expiré?<br><br>1 = Oui<br><br>0 = Non<br><br>99 = Ne sait pas                                                                                           | 7c. Taille de l'emballage<br>(Complétez avec le nombre <u>et</u> encerclez le type)<br>Il y a un total de [ ][ ][ ][ ] comprimés ou suppositoires dans chaque (encerclez le type de emballage):<br><br>1 = Boîte<br>2 = Plaquette |
| 8c. Quantité en stock<br>(Écrivez le nombre total des plaquettes ou boîtes décrits à la <b>Question 7c</b> )<br>Il y a [ ][ ][ ][ ][ ][ ] plaquettes ou boîtes d'antipaludiques en stock dans ce point de vente | 9c. Quantité vendue au cours des <u>7 derniers jours</u> (Écrivez le nombre de plaquettes ou boîtes décrits à la question 7c <b>OU</b> écrire le nombre total de comprimés vendus)<br><br>Ce point de vente a vendu [ ][ ][ ][ ][ ] plaquettes / boîtes au cours des <u>7 derniers jours</u><br><br><b>OU</b><br>Ce point de vente a vendu [ ][ ][ ][ ][ ] comprimés au cours des 7 derniers jours | 10c. Avez-vous connu une rupture de stock de cet antipaludique au cours des <u>3 derniers mois</u> ?<br><br>1 = Oui<br>0 = Non<br>99 = Ne sait pas | 11c. Prix de vente au détail<br><br>[ ][ ][ ] comprimés ou suppositoires pour: [ ][ ][ ][ ][ ] FCFA<br><br>(Si gratuit écrire 00000 comme prix) | N1c. Prix de gros<br>Achat de gros le plus récent du point de vente :<br>[ ][ ][ ][ ][ ] comprimés/suppositoires pour un coût de [ ][ ][ ][ ][ ][ ] FCFA | N1cc. Quantité de gros<br>Achat de gros le plus récent du point de vente :<br>[ ][ ][ ][ ][ ][ ] boîtes/plaquettes (comme décrits en Q7c) achetées OU [ ][ ][ ][ ][ ][ ] comprimés | 12c. Commentaires                                                                                                                                                                                                                 |

[illegible]

|                                                                                                                                                                                                               |                                                                                                                                                                                                                                                                                                                                                                                                           |                                                                                                                                                    |                                                                                                                                                 |                                                                                                                                                          |                                                                                                                                                                                    |                                                                                                                                                                                                                                   |  |
|---------------------------------------------------------------------------------------------------------------------------------------------------------------------------------------------------------------|-----------------------------------------------------------------------------------------------------------------------------------------------------------------------------------------------------------------------------------------------------------------------------------------------------------------------------------------------------------------------------------------------------------|----------------------------------------------------------------------------------------------------------------------------------------------------|-------------------------------------------------------------------------------------------------------------------------------------------------|----------------------------------------------------------------------------------------------------------------------------------------------------------|------------------------------------------------------------------------------------------------------------------------------------------------------------------------------------|-----------------------------------------------------------------------------------------------------------------------------------------------------------------------------------------------------------------------------------|--|
| 1a. Nom générique                                                                                                                                                                                             | 2a. Dosage<br>[ ][ ][ ][ ] , [ ][ ] mg<br><br>[ ][ ][ ][ ] , [ ][ ] mg<br><br>[ ][ ][ ][ ] , [ ][ ] mg                                                                                                                                                                                                                                                                                                    | 3a. Présentation<br><br>1 = Comprimé<br><br>2 = Suppositoire                                                                                       | 4a. Nom de Marque                                                                                                                               | 5a. Fabricant<br><br>5aa. Pays de fabrication                                                                                                            | 6a. L'antipaludique est-il expiré?<br><br>1 = Oui<br><br>0 = Non<br><br>99 = Ne sait pas                                                                                           | 7a. Taille de l'emballage<br>(Complétez avec le nombre <u>et</u> encerclez le type)<br>Il y a un total de [ ][ ][ ][ ] comprimés ou suppositoires dans chaque (encerclez le type de emballage):<br><br>1 = Boîte<br>2 = Plaquette |  |
| 8a. . Quantité en stock<br>(Écrivez le nombre total des plaquettes ou boîtes décrits à la Question 7a)<br><br>Il y a [ ][ ][ ][ ][ ][ ] plaquettes ou boîtes d'antipaludiques en stock dans ce point de vente | 9a. Quantité vendue au cours des <u>7 derniers jours</u> (Écrivez le nombre de plaquettes ou boîtes décrits à la question 7a <u>OU</u> écrire le nombre total de comprimés vendus)<br><br>Ce point de vente a vendu [ ][ ][ ][ ][ ] plaquettes / boîtes au cours des <u>7 derniers jours</u><br><br><u>OU</u><br>Ce point de vente a vendu [ ][ ][ ][ ][ ] comprimés au cours des <u>7 derniers jours</u> | 10a. Avez-vous connu une rupture de stock de cet antipaludique au cours des <u>3 derniers mois</u> ?<br><br>1 = Oui<br>0 = Non<br>99 = Ne sait pas | 11a. Prix de vente au détail<br><br>[ ][ ][ ] comprimés ou suppositoires pour: [ ][ ][ ][ ][ ] FCFA<br><br>(Si gratuit écrire 00000 comme prix) | N1a. Prix de gros<br>Achat de gros le plus récent du point de vente :<br>[ ][ ][ ][ ][ ] comprimés/suppositoires pour un coût de [ ][ ][ ][ ][ ][ ] FCFA | N1aa. Quantité de gros<br>Achat de gros le plus récent du point de vente :<br>[ ][ ][ ][ ][ ][ ] boites/plaquettes (comme décrits en Q7a) achetées OU [ ][ ][ ][ ][ ][ ] comprimés | 12a. Commentaires                                                                                                                                                                                                                 |  |

|                                                                                                                                                                                                      |                                                                                                                                                                                                                                                                                                                                                                                                     |                                                                                                                                                    |                                                                                                                                           |                                                                                                                                                    |                                                                                                                                                                              |                                                                                                                                                                                                                                |
|------------------------------------------------------------------------------------------------------------------------------------------------------------------------------------------------------|-----------------------------------------------------------------------------------------------------------------------------------------------------------------------------------------------------------------------------------------------------------------------------------------------------------------------------------------------------------------------------------------------------|----------------------------------------------------------------------------------------------------------------------------------------------------|-------------------------------------------------------------------------------------------------------------------------------------------|----------------------------------------------------------------------------------------------------------------------------------------------------|------------------------------------------------------------------------------------------------------------------------------------------------------------------------------|--------------------------------------------------------------------------------------------------------------------------------------------------------------------------------------------------------------------------------|
| 1b. Nom générique                                                                                                                                                                                    | 2b. Dosage<br>[ ][ ][ ] , [ ] mg<br>[ ][ ][ ] , [ ] mg<br>[ ][ ][ ] , [ ] mg                                                                                                                                                                                                                                                                                                                        | 3b. Présentation<br>1 = Comprimé<br>2 = Suppositoire                                                                                               | 4b. Nom de Marque                                                                                                                         | 5b. Fabricant<br><br>5bb. Pays de fabrication                                                                                                      | 6b. L'antipaludique est-il expiré?<br><br>1 = Oui<br><br>0 = Non<br><br>99 = Ne sait pas                                                                                     | 7b. Taille de l'Emballage<br>(Complétez avec le nombre <u>et</u> encerclez le type)<br>Il y a un total de [ ][ ][ ] comprimés ou suppositoires dans chaque (encerclez le type de emballage):<br><br>1 = Boîte<br>2 = Plaquette |
| 8b. Quantité en stock<br>(Écrivez le nombre total des plaquettes ou boîtes décrits à la Question 7b)<br>Il y a [ ][ ][ ][ ][ ] plaquettes ou boîtes d'antipaludiques en stock dans ce point de vente | 9b. Quantité vendue au cours des <u>7 derniers jours</u> (Écrivez le nombre de plaquettes ou boîtes décrits à la question 7b <b>OU</b> écrire le nombre total de comprimés vendus)<br><br>Ce point de vente a vendu [ ][ ][ ][ ] plaquettes / boîtes au cours des <u>7 derniers jours</u><br><br><b>OU</b><br>Ce point de vente a vendu [ ][ ][ ][ ] comprimés au cours des <u>7 derniers jours</u> | 10b. Avez-vous connu une rupture de stock de cet antipaludique au cours des <u>3 derniers mois</u> ?<br><br>1 = Oui<br>0 = Non<br>99 = Ne sait pas | 11b. Prix de vente au détail<br><br>[ ][ ] comprimés ou suppositoires pour: [ ][ ][ ][ ] FCFA<br><br>(Si gratuit écrire 00000 comme prix) | N1b. Prix de gros<br>Achat de gros le plus récent du point de vente :<br>[ ][ ][ ][ ] comprimés/suppositoires pour un coût de [ ][ ][ ][ ][ ] FCFA | N1bb. Quantité de gros<br>Achat de gros le plus récent du point de vente :<br>[ ][ ][ ][ ][ ] boîtes/plaquettes (comme décrits en Q7b) achetées OU [ ][ ][ ][ ][ ] comprimés | 12b. Commentaires                                                                                                                                                                                                              |

|                                                                                                                                                                                                                 |                                                                                                                                                                                                                                                                                                                                                                                                    |                                                                                                                                                    |                                                                                                                                                 |                                                                                                                                                          |                                                                                                                                                                                    |                                                                                                                                                                                                                                   |
|-----------------------------------------------------------------------------------------------------------------------------------------------------------------------------------------------------------------|----------------------------------------------------------------------------------------------------------------------------------------------------------------------------------------------------------------------------------------------------------------------------------------------------------------------------------------------------------------------------------------------------|----------------------------------------------------------------------------------------------------------------------------------------------------|-------------------------------------------------------------------------------------------------------------------------------------------------|----------------------------------------------------------------------------------------------------------------------------------------------------------|------------------------------------------------------------------------------------------------------------------------------------------------------------------------------------|-----------------------------------------------------------------------------------------------------------------------------------------------------------------------------------------------------------------------------------|
| 1c. Nom générique                                                                                                                                                                                               | 2c. Dosage<br>[ ][ ][ ][ ] , [ ][ ] mg<br><br>[ ][ ][ ][ ] , [ ][ ] mg<br><br>[ ][ ][ ][ ] , [ ][ ] mg                                                                                                                                                                                                                                                                                             | 3c. Présentation<br><br>1 = Comprimé<br><br>2 = Suppositoire                                                                                       | 4c. Nom de Marque                                                                                                                               | 5c. Fabricant<br><br>5cc. Pays de fabrication                                                                                                            | 6c. L'antipaludique est-il expiré?<br><br>1 = Oui<br><br>0 = Non<br><br>99 = Ne sait pas                                                                                           | 7c. Taille de l'emballage<br>(Complétez avec le nombre <u>et</u> encerclez le type)<br>Il y a un total de [ ][ ][ ][ ] comprimés ou suppositoires dans chaque (encerclez le type de emballage):<br><br>1 = Boîte<br>2 = Plaquette |
| 8c. Quantité en stock<br>(Ecrivez le nombre total des plaquettes ou boîtes décrits à la <b>Question 7c</b> )<br>Il y a [ ][ ][ ][ ][ ][ ] plaquettes ou boîtes d'antipaludiques en stock dans ce point de vente | 9c. Quantité vendue au cours des <u>7 derniers jours</u> (Écrivez le nombre de plaquettes ou boîtes décrits à la question 7c <b>OU</b> écrire le nombre total de comprimés vendus)<br><br>Ce point de vente a vendu [ ][ ][ ][ ][ ] plaquettes / boîtes au cours des <u>7 derniers jours</u><br><br><b>OU</b><br>Ce point de vente a vendu [ ][ ][ ][ ][ ] comprimés au cours des 7 derniers jours | 10c. Avez-vous connu une rupture de stock de cet antipaludique au cours des <u>3 derniers mois</u> ?<br><br>1 = Oui<br>0 = Non<br>99 = Ne sait pas | 11c. Prix de vente au détail<br><br>[ ][ ][ ] comprimés ou suppositoires pour: [ ][ ][ ][ ][ ] FCFA<br><br>(Si gratuit écrire 00000 comme prix) | N1c. Prix de gros<br>Achat de gros le plus récent du point de vente :<br>[ ][ ][ ][ ][ ] comprimés/suppositoires pour un coût de [ ][ ][ ][ ][ ][ ] FCFA | N1cc. Quantité de gros<br>Achat de gros le plus récent du point de vente :<br>[ ][ ][ ][ ][ ][ ] boîtes/plaquettes (comme décrits en Q7c) achetées OU [ ][ ][ ][ ][ ][ ] comprimés | 12c. Commentaires                                                                                                                                                                                                                 |

## FICHE D'AUDIT DU MÉDICAMENT EN COMPRIME ET SUPPOSITOIRE (A utiliser pour les médicaments vendus sous la forme de comprimés ou de suppositoires) Enq-Commune-Ar-PDV: [ ][ ]-[ ][ ]-[ ][ ]-[ ][ ]

|                                                                                                                                                                                                                    |                                                                                                                                                                                                                                                                                                                                                                                                     |                                                                                                                                                    |                                                                                                                                                        |                                                                                                                                                       |                                                                                                                                                                                    |                                                                                                                                                                                                                                |
|--------------------------------------------------------------------------------------------------------------------------------------------------------------------------------------------------------------------|-----------------------------------------------------------------------------------------------------------------------------------------------------------------------------------------------------------------------------------------------------------------------------------------------------------------------------------------------------------------------------------------------------|----------------------------------------------------------------------------------------------------------------------------------------------------|--------------------------------------------------------------------------------------------------------------------------------------------------------|-------------------------------------------------------------------------------------------------------------------------------------------------------|------------------------------------------------------------------------------------------------------------------------------------------------------------------------------------|--------------------------------------------------------------------------------------------------------------------------------------------------------------------------------------------------------------------------------|
| 1a. Nom générique                                                                                                                                                                                                  | 2a. Dosage<br>[ ][ ][ ] , [ ] mg<br>[ ][ ][ ] , [ ] mg<br>[ ][ ][ ] , [ ] mg                                                                                                                                                                                                                                                                                                                        | 3a. Présentation<br>1 = Comprimé<br>2 = Suppositoire                                                                                               | 4a. Nom de Marque                                                                                                                                      | 5a. Fabricant<br><br>5aa. Pays de fabrication                                                                                                         | 6a. L'antipaludique est-il expiré?<br>1 = Oui<br>0 = Non<br>99 = Ne sait pas                                                                                                       | 7a. Taille de l'emballage<br>(Complétez avec le nombre <u>et</u> encerclez le type)<br>Il y a un total de [ ][ ][ ] comprimés ou suppositoires dans chaque (encerclez le type de emballage):<br><br>1 = Boîte<br>2 = Plaquette |
| 8a. . Quantité en stock<br>(Écrivez le nombre total des plaquettes ou boîtes décrits à la <b>Question 7a</b> )<br><br>Il y a [ ][ ][ ][ ][ ] plaquettes ou boîtes d'antipaludiques en stock dans ce point de vente | 9a. Quantité vendue au cours des <b>7 derniers jours</b> (Écrivez le nombre de plaquettes ou boîtes décrits à la question 7a <b>OU</b> écrire le nombre total de comprimés vendus)<br><br>Ce point de vente a vendu [ ][ ][ ][ ] plaquettes / boîtes au cours des <b>7 derniers jours</b><br><br><b>OU</b><br>Ce point de vente a vendu [ ][ ][ ][ ] comprimés au cours des <b>7 derniers jours</b> | 10a. Avez-vous connu une rupture de stock de cet antipaludique au cours des <b>3 derniers mois</b> ?<br><br>1 = Oui<br>0 = Non<br>99 = Ne sait pas | 11a. Prix de vente au détail<br><br>[ ][ ] comprimés ou<br><br>suppositoires pour:<br>[ ][ ][ ][ ][ ] FCFA<br><br>(Si gratuit écrire 00000 comme prix) | N1a. Prix de gros<br>Achat de gros le plus récent du point de vente :<br>[ ][ ][ ][ ] comprimés/suppositoires pour un coût de<br>[ ][ ][ ][ ][ ] FCFA | N1aa. Quantité de gros<br>Achat de gros le plus récent du point de vente :<br>[ ][ ][ ][ ][ ] boîtes/plaquettes (comme décrits en Q7a) achetées<br>OU<br>[ ][ ][ ][ ][ ] comprimés | 12a. Commentaires                                                                                                                                                                                                              |

|                                                                                                                                                                                                           |                                                                                                                                                                                                                                                                                                                                                                                                     |                                                                                                                                                    |                                                                                                                                              |                                                                                                                                                       |                                                                                                                                                                                 |                                                                                                                                                                                                                                 |
|-----------------------------------------------------------------------------------------------------------------------------------------------------------------------------------------------------------|-----------------------------------------------------------------------------------------------------------------------------------------------------------------------------------------------------------------------------------------------------------------------------------------------------------------------------------------------------------------------------------------------------|----------------------------------------------------------------------------------------------------------------------------------------------------|----------------------------------------------------------------------------------------------------------------------------------------------|-------------------------------------------------------------------------------------------------------------------------------------------------------|---------------------------------------------------------------------------------------------------------------------------------------------------------------------------------|---------------------------------------------------------------------------------------------------------------------------------------------------------------------------------------------------------------------------------|
| 1b. Nom générique                                                                                                                                                                                         | 2b. Dosage<br>[ ][ ][ ] , [ ] mg<br>[ ][ ][ ] , [ ] mg<br>[ ][ ][ ] , [ ] mg                                                                                                                                                                                                                                                                                                                        | 3b. Présentation<br>1 = Comprimé<br>2 = Suppositoire                                                                                               | 4b. Nom de Marque                                                                                                                            | 5b. Fabricant<br><br>5bb. Pays de fabrication                                                                                                         | 6b. L'antipaludique est-il expiré?<br><br>1 = Oui<br><br>0 = Non<br><br>99 = Ne sait pas                                                                                        | 7b. Taille de l'Emballage<br>(Complétez avec le nombre <u>et</u> encerclez le type)<br>Il y a un total de [ ][ ][ ] comprimés ou suppositoires dans chaque (encerclez le type de emballage):<br><br>1 = Boîte<br>2 = Plaqueette |
| 8b. Quantité en stock<br>(Écrivez le nombre total des plaquettes ou boîtes décrits à la <b>Question 7b</b> )<br>Il y a [ ][ ][ ][ ] plaquettes ou boîtes d'antipaludiques en stock dans ce point de vente | 9b. Quantité vendue au cours des <b>7 derniers jours</b> (Écrivez le nombre de plaquettes ou boîtes décrits à la question 7b <b>OU</b> écrire le nombre total de comprimés vendus)<br><br>Ce point de vente a vendu [ ][ ][ ][ ] plaquettes / boîtes au cours des <b>7 derniers jours</b><br><br><b>OU</b><br>Ce point de vente a vendu [ ][ ][ ][ ] comprimés au cours des <b>7 derniers jours</b> | 10b. Avez-vous connu une rupture de stock de cet antipaludique au cours des <b>3 derniers mois</b> ?<br><br>1 = Oui<br>0 = Non<br>99 = Ne sait pas | 11b. Prix de vente au détail<br><br>[ ][ ] comprimés ou suppositoires pour: [ ][ ][ ][ ][ ] FCFA<br><br>(Si gratuit écrire 00000 comme prix) | N1b. Prix de gros<br>Achat de gros le plus récent du point de vente :<br>[ ][ ][ ][ ] comprimés/suppositoires pour un coût de [ ][ ][ ][ ][ ][ ] FCFA | N1bb. Quantité de gros<br>Achat de gros le plus récent du point de vente :<br>[ ][ ][ ][ ][ ] boîtes/plaquettes (comme décrits en Q7b) achetées OU [ ][ ][ ][ ][ ][ ] comprimés | 12b. Commentaires                                                                                                                                                                                                               |

|                                                                                                                                                                                                      |                                                                                                                                                                                                                                                                                                                                                                                                 |                                                      |                                                                                                                                                    |                                                                                                                                                        |                                                                                                                                                          |                                                                                                                                                                                                                                    |                   |
|------------------------------------------------------------------------------------------------------------------------------------------------------------------------------------------------------|-------------------------------------------------------------------------------------------------------------------------------------------------------------------------------------------------------------------------------------------------------------------------------------------------------------------------------------------------------------------------------------------------|------------------------------------------------------|----------------------------------------------------------------------------------------------------------------------------------------------------|--------------------------------------------------------------------------------------------------------------------------------------------------------|----------------------------------------------------------------------------------------------------------------------------------------------------------|------------------------------------------------------------------------------------------------------------------------------------------------------------------------------------------------------------------------------------|-------------------|
| 1c. Nom générique                                                                                                                                                                                    | 2c. Dosage<br>[ ][ ][ ] , [ ] mg<br>[ ][ ][ ] , [ ] mg<br>[ ][ ][ ] , [ ] mg                                                                                                                                                                                                                                                                                                                    | 3c. Présentation<br>1 = Comprimé<br>2 = Suppositoire | 4c. Nom de Marque                                                                                                                                  | 5c. Fabricant<br><br>5cc. Pays de fabrication                                                                                                          | 6c. L'antipaludique est-il expiré?<br>1 = Oui<br>0 = Non<br>99 = Ne sait pas                                                                             | 7c. Taille de l'emballage<br>(Complétez avec le nombre <u>et</u> encerclez le type)<br>Il y a un total de [ ][ ][ ][ ] comprimés ou suppositoires dans chaque (encerclez le type de emballage):<br><br>1 = Boîte<br>2 = Plaqueette |                   |
| 8c. Quantité en stock<br>(Écrivez le nombre total des plaquettes ou boîtes décrits à la Question 7c)<br>Il y a [ ][ ][ ][ ][ ] plaquettes ou boîtes d'antipaludiques en stock dans ce point de vente | 9c. Quantité vendue au cours des <u>7 derniers jours</u> (Écrivez le nombre de plaquettes ou boîtes décrits à la question 7c <b>OU</b> écrire le nombre total de comprimés vendus)<br><br>Ce point de vente a vendu [ ][ ][ ][ ] plaquettes / boîtes au cours des <u>7 derniers jours</u><br><b>OU</b><br>Ce point de vente a vendu [ ][ ][ ][ ] comprimés au cours des <u>7 derniers jours</u> |                                                      | 10c. Avez-vous connu une rupture de stock de cet antipaludique au cours des <u>3 derniers mois</u> ?<br><br>1 = Oui<br>0 = Non<br>99 = Ne sait pas | 11c. Prix de vente au détail<br><br>[ ][ ] comprimés ou<br><br>suppositoires pour:<br>[ ][ ][ ][ ][ ] FCFA<br><br>(Si gratuit écrire 00000 comme prix) | N1c. Prix de gros<br>Achat de gros le plus récent du point de vente :<br>[ ][ ][ ][ ] comprimés/suppositoires pour un coût de<br>[ ][ ][ ][ ][ ][ ] FCFA | N1cc. Quantité de gros<br>Achat de gros le plus récent du point de vente :<br>[ ][ ][ ][ ][ ] boîtes/plaquettes (comme décrits en Q7c) achetées OU<br>[ ][ ][ ][ ][ ] comprimés                                                    | 12c. Commentaires |

## FICHE D'AUDIT DU MÉDICAMENT EN COMPRIME ET SUPPOSITOIRE (A utiliser pour les médicaments vendus sous la forme de comprimés ou de suppositoires) Enq-Commune-Ar-PDV: [ ][ ]-[ ][ ]-[ ][ ]-[ ][ ]

|                                                                                                                                                                                                                    |                                                                                                                                                                                                                                                                                                                                                                                                     |                                                                                                                                                    |                                                                                                                                                        |                                                                                                                                                    |                                                                                                                                                                                    |                                                                                                                                                                                                                                 |
|--------------------------------------------------------------------------------------------------------------------------------------------------------------------------------------------------------------------|-----------------------------------------------------------------------------------------------------------------------------------------------------------------------------------------------------------------------------------------------------------------------------------------------------------------------------------------------------------------------------------------------------|----------------------------------------------------------------------------------------------------------------------------------------------------|--------------------------------------------------------------------------------------------------------------------------------------------------------|----------------------------------------------------------------------------------------------------------------------------------------------------|------------------------------------------------------------------------------------------------------------------------------------------------------------------------------------|---------------------------------------------------------------------------------------------------------------------------------------------------------------------------------------------------------------------------------|
| 1a. Nom générique                                                                                                                                                                                                  | 2a. Dosage<br>[ ][ ][ ] , [ ] mg<br>[ ][ ][ ] , [ ] mg<br>[ ][ ][ ] , [ ] mg                                                                                                                                                                                                                                                                                                                        | 3a. Présentation<br>1 = Comprimé<br>2 = Suppositoire                                                                                               | 4a. Nom de Marque                                                                                                                                      | 5a. Fabricant<br><br>5aa. Pays de fabrication                                                                                                      | 6a. L'antipaludique est-il expiré?<br>1 = Oui<br>0 = Non<br>99 = Ne sait pas                                                                                                       | 7a. Taille de l'emballage<br>(Complétez avec le nombre <u>et</u> encerclez le type)<br>Il y a un total de [ ][ ][ ] comprimés ou suppositoires dans chaque (encerclez le type de emballage):<br><br>1 = Boîte<br>2 = Plaqueette |
| 8a. . Quantité en stock<br>(Écrivez le nombre total des plaquettes ou boîtes décrits à la <b>Question 7a</b> )<br><br>Il y a [ ][ ][ ][ ][ ] plaquettes ou boîtes d'antipaludiques en stock dans ce point de vente | 9a. Quantité vendue au cours des <u>7 derniers jours</u> (Écrivez le nombre de plaquettes ou boîtes décrits à la question 7a <b>OU</b> écrire le nombre total de comprimés vendus)<br><br>Ce point de vente a vendu [ ][ ][ ][ ] plaquettes / boîtes au cours des <u>7 derniers jours</u><br><br><b>OU</b><br>Ce point de vente a vendu [ ][ ][ ][ ] comprimés au cours des <u>7 derniers jours</u> | 10a. Avez-vous connu une rupture de stock de cet antipaludique au cours des <u>3 derniers mois</u> ?<br><br>1 = Oui<br>0 = Non<br>99 = Ne sait pas | 11a. Prix de vente au détail<br><br>[ ][ ] comprimés ou<br><br>suppositoires pour:<br>[ ][ ][ ][ ][ ] FCFA<br><br>(Si gratuit écrire 00000 comme prix) | N1a. Prix de gros<br>Achat de gros le plus récent du point de vente :<br>[ ][ ][ ][ ] comprimés/suppositoires pour un coût de [ ][ ][ ][ ][ ] FCFA | N1aa. Quantité de gros<br>Achat de gros le plus récent du point de vente :<br>[ ][ ][ ][ ][ ] boîtes/plaquettes (comme décrits en Q7a) achetées<br>OU<br>[ ][ ][ ][ ][ ] comprimés | 12a. Commentaires                                                                                                                                                                                                               |

|                                                                                                                                                                                                                                                                                                |                                                                                                                                                                                                                                                                                                                                                                                                                                                                                                                      |                                                                                                                                                          |                                                                                                                                                                                                                                                 |                                                                                                                                                                                                                                                                                             |                                                                                                                                                                                                                                                                                                                                                  |                                                                                                                                                                                                                                                                                                          |  |
|------------------------------------------------------------------------------------------------------------------------------------------------------------------------------------------------------------------------------------------------------------------------------------------------|----------------------------------------------------------------------------------------------------------------------------------------------------------------------------------------------------------------------------------------------------------------------------------------------------------------------------------------------------------------------------------------------------------------------------------------------------------------------------------------------------------------------|----------------------------------------------------------------------------------------------------------------------------------------------------------|-------------------------------------------------------------------------------------------------------------------------------------------------------------------------------------------------------------------------------------------------|---------------------------------------------------------------------------------------------------------------------------------------------------------------------------------------------------------------------------------------------------------------------------------------------|--------------------------------------------------------------------------------------------------------------------------------------------------------------------------------------------------------------------------------------------------------------------------------------------------------------------------------------------------|----------------------------------------------------------------------------------------------------------------------------------------------------------------------------------------------------------------------------------------------------------------------------------------------------------|--|
| <b>1b. Nom générique</b><br><br>                                                                                                                                                                                                                                                               | <b>2b. Dosage</b><br><div> <div> <div></div> <div></div> <div></div> </div> <div> <div></div> <div></div> <div></div> </div> <div> <div></div> <div></div> <div></div> </div> </div> <div> <div></div> <div></div> <div></div> </div>                                                                                                                             | <b>3b. Présentation</b><br><br>1 = Comprimé<br><br>2 = Suppositoire                                                                                      | <b>4b. Nom de Marque</b><br><br>                                                                                                                                                                                                                | <b>5b. Fabricant</b><br><br><b>5bb. Pays de fabrication</b>                                                                                                                                                                                                                                 | <b>6b. L'antipaludique est-il expiré?</b><br><br>1 = Oui<br><br>0 = Non<br><br>99 = Ne sait pas                                                                                                                                                                                                                                                  | <b>7b. Taille de l'Emballage</b><br><i>(Complétez avec le nombre <b>et</b> encerclez le type)</i><br>Il y a un total de <div> <div></div> <div></div> <div></div> <div></div> </div> comprimés ou suppositoires dans chaque <i>(encerclez le type de emballage)</i> :<br><br>1 = Boîte<br>2 = Plaqueette |  |
| <b>8b. Quantité en stock</b><br><i>(Ecrivez le nombre total des plaquettes ou boîtes décrits à la <b>Question 7b</b>)</i><br>Il y a <div> <div></div> <div></div> <div></div> <div></div> <div></div> <div></div> </div> plaquettes ou boîtes d'antipaludiques en stock dans ce point de vente | <b>9b. Quantité vendue au cours des <u>7 derniers jours</u></b><br><i>(Ecrivez le nombre de plaquettes ou boîtes décrits à la question 7b <b>OU</b> écrire le nombre total de comprimés vendus)</i><br><br>Ce point de vente a vendu <div> <div></div> <div></div> <div></div> <div></div> </div> plaquettes / boîtes au cours des <u>7 derniers jours</u><br><br><b>OU</b><br>Ce point de vente a vendu <div> <div></div> <div></div> <div></div> <div></div> </div> comprimés au cours des <u>7 derniers jours</u> | <b>10b. Avez-vous connu une rupture de stock de cet antipaludique au cours des <u>3 derniers mois</u>?</b><br><br>1 = Oui<br>0 = Non<br>99 = Ne sait pas | <b>11b. Prix de vente au détail</b><br><br><div> <div></div> <div></div> </div> comprimés ou<br><br>suppositoires pour:<br><div> <div></div> <div></div> <div></div> <div></div> </div> FCFA<br><br><i>(Si gratuit écrire 00000 comme prix)</i> | <b>N1b. Prix de gros</b><br><i>Achat de gros le plus récent du point de vente :</i><br><div> <div></div> <div></div> <div></div> <div></div> </div><br>comprimés/suppositoires pour un coût de<br><div> <div></div> <div></div> <div></div> <div></div> <div></div> <div></div> </div> FCFA | <b>N1bb. Quantité de gros</b><br><i>Achat de gros le plus récent du point de vente :</i><br><div> <div></div> <div></div> <div></div> <div></div> <div></div> <div></div> </div><br>boîtes/plaquettes (comme décrits en Q7b) achetées<br>OU<br><div> <div></div> <div></div> <div></div> <div></div> <div></div> <div></div> </div><br>comprimés | <b>12b. Commentaires</b>                                                                                                                                                                                                                                                                                 |  |

|                                                                                                                                                                                                              |                                                                                                                                                                                                                                                                                                                                                                                                           |                                                              |                                                                                                                                                    |                                                                                                                                                        |                                                                                                                                                          |                                                                                                                                                                                                                                    |                   |
|--------------------------------------------------------------------------------------------------------------------------------------------------------------------------------------------------------------|-----------------------------------------------------------------------------------------------------------------------------------------------------------------------------------------------------------------------------------------------------------------------------------------------------------------------------------------------------------------------------------------------------------|--------------------------------------------------------------|----------------------------------------------------------------------------------------------------------------------------------------------------|--------------------------------------------------------------------------------------------------------------------------------------------------------|----------------------------------------------------------------------------------------------------------------------------------------------------------|------------------------------------------------------------------------------------------------------------------------------------------------------------------------------------------------------------------------------------|-------------------|
| 1c. Nom générique                                                                                                                                                                                            | 2c. Dosage<br>[ ][ ][ ][ ] mg                                                                                                                                                                                                                                                                                                                                                                             | 3c. Présentation<br><br>1 = Comprimé<br><br>2 = Suppositoire | 4c. Nom de Marque                                                                                                                                  | 5c. Fabricant                                                                                                                                          | 6c. L'antipaludique est-il expiré?<br><br>1 = Oui<br><br>0 = Non<br><br>99 = Ne sait pas                                                                 | 7c. Taille de l'emballage<br>(Complétez avec le nombre <u>et</u> encerclez le type)<br>Il y a un total de [ ][ ][ ][ ] comprimés ou suppositoires dans chaque (encerclez le type de emballage):<br><br>1 = Boîte<br>2 = Plaqueette |                   |
|                                                                                                                                                                                                              | [ ][ ][ ][ ] mg                                                                                                                                                                                                                                                                                                                                                                                           |                                                              |                                                                                                                                                    | 5cc. Pays de fabrication                                                                                                                               |                                                                                                                                                          |                                                                                                                                                                                                                                    |                   |
|                                                                                                                                                                                                              | [ ][ ][ ][ ] mg                                                                                                                                                                                                                                                                                                                                                                                           |                                                              |                                                                                                                                                    |                                                                                                                                                        |                                                                                                                                                          |                                                                                                                                                                                                                                    |                   |
| 8c. Quantité en stock<br>(Écrivez le nombre total des plaquettes ou boîtes décrits à la <b>Question 7c</b> )<br>Il y a [ ][ ][ ][ ][ ] plaquettes ou boîtes d'antipaludiques en stock dans ce point de vente | 9c. Quantité vendue au cours des <b>7 derniers jours</b> (Écrivez le nombre de plaquettes ou boîtes décrits à la question 7c <b>OU</b> écrire le nombre total de comprimés vendus)<br><br>Ce point de vente a vendu [ ][ ][ ][ ][ ] plaquettes / boîtes au cours des <b>7 derniers jours</b><br><br><b>OU</b><br>Ce point de vente a vendu [ ][ ][ ][ ][ ] comprimés au cours des <b>7 derniers jours</b> |                                                              | 10c. Avez-vous connu une rupture de stock de cet antipaludique au cours des <b>3 derniers mois</b> ?<br><br>1 = Oui<br>0 = Non<br>99 = Ne sait pas | 11c. Prix de vente au détail<br><br>[ ][ ] comprimés ou<br><br>suppositoires pour:<br>[ ][ ][ ][ ][ ] FCFA<br><br>(Si gratuit écrire 00000 comme prix) | N1c. Prix de gros<br>Achat de gros le plus récent du point de vente :<br>[ ][ ][ ][ ][ ] comprimés/suppositoires pour un coût de [ ][ ][ ][ ][ ][ ] FCFA | N1cc. Quantité de gros<br>Achat de gros le plus récent du point de vente :<br>[ ][ ][ ][ ][ ][ ] boites/plaquettes (comme décrits en Q7c) achetées<br>OU<br>[ ][ ][ ][ ][ ][ ] comprimés                                           | 12c. Commentaires |

## FICHE D'AUDIT DU MÉDICAMENT EN COMPRIME ET SUPPOSITOIRE (A utiliser pour les médicaments vendus sous la forme de comprimés ou de suppositoires) Enq-Commune-Ar-PDV: [ ][ ]-[ ][ ]-[ ][ ]-[ ][ ]

|                                                                                                                                                                                                                                                                                   |                                                                                                                                                                                                                                                                                                                                                                                                                                                                                                            |                                                                                                                                                   |                                                                                                                                                                                                                                       |                                                                                                                                                                                                                                                               |                                                                                                                                                                                                                                                                                             |                                                                                                                                                                                                                                                                                             |
|-----------------------------------------------------------------------------------------------------------------------------------------------------------------------------------------------------------------------------------------------------------------------------------|------------------------------------------------------------------------------------------------------------------------------------------------------------------------------------------------------------------------------------------------------------------------------------------------------------------------------------------------------------------------------------------------------------------------------------------------------------------------------------------------------------|---------------------------------------------------------------------------------------------------------------------------------------------------|---------------------------------------------------------------------------------------------------------------------------------------------------------------------------------------------------------------------------------------|---------------------------------------------------------------------------------------------------------------------------------------------------------------------------------------------------------------------------------------------------------------|---------------------------------------------------------------------------------------------------------------------------------------------------------------------------------------------------------------------------------------------------------------------------------------------|---------------------------------------------------------------------------------------------------------------------------------------------------------------------------------------------------------------------------------------------------------------------------------------------|
| <b>1a. Nom générique</b><br><br>                                                                                                                                                                                                                                                  | <b>2a. Dosage</b><br><div> <div> <div></div> <div></div> <div></div> </div> <div> <div></div> <div></div> <div></div> </div> </div> , <div> <div></div> </div> mg                                                                                                                                                                                                                                                                                                                                          | <b>3a. Présentation</b><br><br>1 = Comprimé<br><br>2 = Suppositoire                                                                               | <b>4a. Nom de Marque</b><br><br>                                                                                                                                                                                                      | <b>5a. Fabricant</b><br><br>                                                                                                                                                                                                                                  | <b>6a. L'antipaludique est-il expiré?</b><br><br>1 = Oui<br><br>0 = Non<br><br>99 = Ne sait pas                                                                                                                                                                                             | <b>7a. Taille de l'emballage</b><br><i>(Complétez avec le nombre <u>et</u> encerclez le type)</i><br>Il y a un total de <div> <div></div> <div></div> <div></div> </div> comprimés ou suppositoires dans chaque <i>(encerclez le type de emballage)</i> :<br><br>1 = Boîte<br>2 = Plaquette |
|                                                                                                                                                                                                                                                                                   | <div> <div></div> <div></div> <div></div> </div> <div> <div></div> <div></div> <div></div> </div> , <div> <div></div> </div> mg                                                                                                                                                                                                                                                                                                                                                                            |                                                                                                                                                   |                                                                                                                                                                                                                                       | <b>5aa. Pays de fabrication</b><br><br>                                                                                                                                                                                                                       |                                                                                                                                                                                                                                                                                             |                                                                                                                                                                                                                                                                                             |
|                                                                                                                                                                                                                                                                                   | <div> <div></div> <div></div> <div></div> </div> <div> <div></div> <div></div> <div></div> </div> , <div> <div></div> </div> mg                                                                                                                                                                                                                                                                                                                                                                            |                                                                                                                                                   |                                                                                                                                                                                                                                       |                                                                                                                                                                                                                                                               |                                                                                                                                                                                                                                                                                             |                                                                                                                                                                                                                                                                                             |
| <b>8a. . Quantité en stock</b><br><i>(Écrivez le nombre total des plaquettes ou boîtes décrits à la Question 7a)</i><br><br>Il y a <div> <div></div> <div></div> <div></div> <div></div> <div></div> </div> plaquettes ou boîtes d'antipaludiques en stock dans ce point de vente | <b>9a. Quantité vendue au cours des 7 derniers jours</b> <i>(Écrivez le nombre de plaquettes ou boîtes décrits à la question 7a <b>OU</b> écrire le nombre total de comprimés vendus)</i><br><br>Ce point de vente a vendu <div> <div></div> <div></div> <div></div> <div></div> </div> plaquettes / boîtes au cours des <u>7 derniers jours</u><br><br><b>OU</b><br>Ce point de vente a vendu <div> <div></div> <div></div> <div></div> <div></div> </div> comprimés au cours des <u>7 derniers jours</u> | <b>10a. Avez-vous connu une rupture de stock de cet antipaludique au cours des 3 derniers mois?</b><br><br>1 = Oui<br>0 = Non<br>99 = Ne sait pas | <b>11a. Prix de vente au détail</b><br><br><div> <div></div> <div></div> </div> comprimés ou suppositoires pour: <div> <div></div> <div></div> <div></div> <div></div> </div> FCFA<br><br><i>(Si gratuit écrire 00000 comme prix)</i> | <b>N1a. Prix de gros</b><br><i>Achat de gros le plus récent du point de vente :</i><br><div> <div></div> <div></div> <div></div> <div></div> </div> comprimés/suppositoires pour un coût de <div> <div></div> <div></div> <div></div> <div></div> </div> FCFA | <b>N1aa. Quantité de gros</b><br><i>Achat de gros le plus récent du point de vente :</i><br><div> <div></div> <div></div> <div></div> <div></div> </div> boîtes/plaquettes (comme décrits en Q7a) achetées <b>OU</b> <div> <div></div> <div></div> <div></div> <div></div> </div> comprimés | <b>12a. Commentaires</b><br><br>                                                                                                                                                                                                                                                            |

|                                                                                                                                                                                                   |                                                                                                                                                                                                                                                                                                                                                                                                     |                                                              |                                                                                                                                                    |                                                                                                                                                     |                                                                                                                                                    |                                                                                                                                                                                                                                |                   |  |  |  |
|---------------------------------------------------------------------------------------------------------------------------------------------------------------------------------------------------|-----------------------------------------------------------------------------------------------------------------------------------------------------------------------------------------------------------------------------------------------------------------------------------------------------------------------------------------------------------------------------------------------------|--------------------------------------------------------------|----------------------------------------------------------------------------------------------------------------------------------------------------|-----------------------------------------------------------------------------------------------------------------------------------------------------|----------------------------------------------------------------------------------------------------------------------------------------------------|--------------------------------------------------------------------------------------------------------------------------------------------------------------------------------------------------------------------------------|-------------------|--|--|--|
| 1b. Nom générique                                                                                                                                                                                 | 2b. Dosage<br>[ ][ ][ ] , [ ] mg                                                                                                                                                                                                                                                                                                                                                                    | 3b. Présentation<br><br>1 = Comprimé<br><br>2 = Suppositoire | 4b. Nom de Marque                                                                                                                                  | 5b. Fabricant                                                                                                                                       | 6b. L'antipaludique est-il expiré?<br><br>1 = Oui<br><br>0 = Non<br><br>99 = Ne sait pas                                                           | 7b. Taille de l'Emballage<br>(Complétez avec le nombre <u>et</u> encerclez le type)<br>Il y a un total de [ ][ ][ ] comprimés ou suppositoires dans chaque (encerclez le type de emballage):<br><br>1 = Boîte<br>2 = Plaquette |                   |  |  |  |
|                                                                                                                                                                                                   | [ ][ ][ ] , [ ] mg                                                                                                                                                                                                                                                                                                                                                                                  |                                                              |                                                                                                                                                    | 5bb. Pays de fabrication                                                                                                                            |                                                                                                                                                    |                                                                                                                                                                                                                                |                   |  |  |  |
|                                                                                                                                                                                                   | [ ][ ][ ] , [ ] mg                                                                                                                                                                                                                                                                                                                                                                                  |                                                              |                                                                                                                                                    |                                                                                                                                                     |                                                                                                                                                    |                                                                                                                                                                                                                                |                   |  |  |  |
| 8b. Quantité en stock<br>(Écrivez le nombre total des plaquettes ou boîtes décrits à la Question 7b)<br>Il y a [ ][ ][ ][ ] plaquettes ou boîtes d'antipaludiques en stock dans ce point de vente | 9b. Quantité vendue au cours des <u>7 derniers jours</u> (Écrivez le nombre de plaquettes ou boîtes décrits à la question 7b <b>OU</b> écrire le nombre total de comprimés vendus)<br><br>Ce point de vente a vendu [ ][ ][ ][ ] plaquettes / boîtes au cours des <u>7 derniers jours</u><br><br><b>OU</b><br>Ce point de vente a vendu [ ][ ][ ][ ] comprimés au cours des <u>7 derniers jours</u> |                                                              | 10b. Avez-vous connu une rupture de stock de cet antipaludique au cours des <u>3 derniers mois</u> ?<br><br>1 = Oui<br>0 = Non<br>99 = Ne sait pas | 11b. Prix de vente au détail<br><br>[ ][ ] comprimés ou<br><br>suppositoires pour:<br>[ ][ ][ ][ ] FCFA<br><br>(Si gratuit écrire 00000 comme prix) | N1b. Prix de gros<br>Achat de gros le plus récent du point de vente :<br>[ ][ ][ ][ ] comprimés/suppositoires pour un coût de [ ][ ][ ][ ][ ] FCFA | N1bb. Quantité de gros<br>Achat de gros le plus récent du point de vente :<br>[ ][ ][ ][ ][ ] boîtes/plaquettes (comme décrits en Q7b) achetées<br>OU<br>[ ][ ][ ][ ][ ] comprimés                                             | 12b. Commentaires |  |  |  |

|                                                                                                                                                                                                   |                                                                                                                                                                                                                                                                                                                                                                                                     |                                                              |                                                                                                                                                    |                                                                                                                                                     |                                                                                                                                                    |                                                                                                                                                                                                                                |                   |
|---------------------------------------------------------------------------------------------------------------------------------------------------------------------------------------------------|-----------------------------------------------------------------------------------------------------------------------------------------------------------------------------------------------------------------------------------------------------------------------------------------------------------------------------------------------------------------------------------------------------|--------------------------------------------------------------|----------------------------------------------------------------------------------------------------------------------------------------------------|-----------------------------------------------------------------------------------------------------------------------------------------------------|----------------------------------------------------------------------------------------------------------------------------------------------------|--------------------------------------------------------------------------------------------------------------------------------------------------------------------------------------------------------------------------------|-------------------|
| 1c. Nom générique                                                                                                                                                                                 | 2c. Dosage<br>[ ][ ][ ] , [ ] mg                                                                                                                                                                                                                                                                                                                                                                    | 3c. Présentation<br><br>1 = Comprimé<br><br>2 = Suppositoire | 4c. Nom de Marque                                                                                                                                  | 5c. Fabricant                                                                                                                                       | 6c. L'antipaludique est-il expiré?<br><br>1 = Oui<br><br>0 = Non<br><br>99 = Ne sait pas                                                           | 7c. Taille de l'emballage<br>(Complétez avec le nombre <u>et</u> encerclez le type)<br>Il y a un total de [ ][ ][ ] comprimés ou suppositoires dans chaque (encerclez le type de emballage):<br><br>1 = Boîte<br>2 = Plaquette |                   |
|                                                                                                                                                                                                   | [ ][ ][ ] , [ ] mg                                                                                                                                                                                                                                                                                                                                                                                  |                                                              |                                                                                                                                                    | 5cc. Pays de fabrication                                                                                                                            |                                                                                                                                                    |                                                                                                                                                                                                                                |                   |
|                                                                                                                                                                                                   | [ ][ ][ ] , [ ] mg                                                                                                                                                                                                                                                                                                                                                                                  |                                                              |                                                                                                                                                    |                                                                                                                                                     |                                                                                                                                                    |                                                                                                                                                                                                                                |                   |
| 8c. Quantité en stock<br>(Écrivez le nombre total des plaquettes ou boîtes décrits à la Question 7c)<br>Il y a [ ][ ][ ][ ] plaquettes ou boîtes d'antipaludiques en stock dans ce point de vente | 9c. Quantité vendue au cours des <u>7 derniers jours</u> (Écrivez le nombre de plaquettes ou boîtes décrits à la question 7c <u>OU</u> écrire le nombre total de comprimés vendus)<br><br>Ce point de vente a vendu [ ][ ][ ][ ] plaquettes / boîtes au cours des <u>7 derniers jours</u><br><br><u>OU</u><br>Ce point de vente a vendu [ ][ ][ ][ ] comprimés au cours des <u>7 derniers jours</u> |                                                              | 10c. Avez-vous connu une rupture de stock de cet antipaludique au cours des <u>3 derniers mois</u> ?<br><br>1 = Oui<br>0 = Non<br>99 = Ne sait pas | 11c. Prix de vente au détail<br><br>[ ][ ] comprimés ou<br><br>suppositoires pour:<br>[ ][ ][ ][ ] FCFA<br><br>(Si gratuit écrire 00000 comme prix) | N1c. Prix de gros<br>Achat de gros le plus récent du point de vente :<br>[ ][ ][ ][ ] comprimés/suppositoires pour un coût de [ ][ ][ ][ ][ ] FCFA | N1cc. Quantité de gros<br>Achat de gros le plus récent du point de vente :<br>[ ][ ][ ][ ][ ] boîtes/plaquettes (comme décrits en Q7c) achetées OU [ ][ ][ ][ ][ ] comprimés                                                   | 12c. Commentaires |

**FICHE D'AUDIT DU MÉDICAMENT AUTRE QUE COMPRIME** (pour sirops, suspensions, liquides et poudres injectables, granules, et autres) Enq-Com-Arrond-PDV: [ ][ ][ ]-[ ][ ][ ]-[ ][ ][ ]-[ ][ ][ ]

|                                                                                                                                                                                                  |                                                                                                                                                                                                                                                                    |                                                                                                                                                           |                                                                                                                                                     |                                                                                                                                                                 |                                                                                                                                                                    |                                                                                                                                                                                                                                                                                    |
|--------------------------------------------------------------------------------------------------------------------------------------------------------------------------------------------------|--------------------------------------------------------------------------------------------------------------------------------------------------------------------------------------------------------------------------------------------------------------------|-----------------------------------------------------------------------------------------------------------------------------------------------------------|-----------------------------------------------------------------------------------------------------------------------------------------------------|-----------------------------------------------------------------------------------------------------------------------------------------------------------------|--------------------------------------------------------------------------------------------------------------------------------------------------------------------|------------------------------------------------------------------------------------------------------------------------------------------------------------------------------------------------------------------------------------------------------------------------------------|
| <b>1a. Nom générique</b>                                                                                                                                                                         | <b>2a. Dosage</b><br>[ ][ ][ ][ ]mg/[ ][ ][ ][ ]mL                                                                                                                                                                                                                 | <b>3a. Présentation</b><br>3 = Sirop<br>4 = Suspension<br>5 = Liquide injectable<br>6 = Poudre injectable<br>7 = Granule<br>8 = Autre<br>(précisez) _____ | <b>4a. Nom de Marque</b>                                                                                                                            | <b>5a. Fabricant</b>                                                                                                                                            | <b>6a. L'antipaludique est-il expiré?</b><br>1 = Oui<br><br>0 = Non<br><br>99 = Ne sait pas                                                                        | <b>7a. Taille de l'emballage</b><br>(Écrire le nombre <u>et</u> Encercler le type)<br>Il y un total de [ ][ ][ ][ ] mL<br>(ou mg pour les granules et la poudre injectable) dans chaque:(Encercler le type d'emballage):<br>1 = Bouteille<br>2 = Ampoule<br>3 = Sachet de Granules |
|                                                                                                                                                                                                  | [ ][ ][ ][ ]mg/[ ][ ][ ][ ]mL                                                                                                                                                                                                                                      |                                                                                                                                                           |                                                                                                                                                     | <b>5aa. Pays de fabrication</b>                                                                                                                                 |                                                                                                                                                                    |                                                                                                                                                                                                                                                                                    |
|                                                                                                                                                                                                  | [ ][ ][ ][ ]mg/[ ][ ][ ][ ]mL<br>(Note : ne pas saisir de mL pour les poudres et les granules)                                                                                                                                                                     |                                                                                                                                                           |                                                                                                                                                     |                                                                                                                                                                 |                                                                                                                                                                    |                                                                                                                                                                                                                                                                                    |
| <b>8a. Quantité en stock</b><br>(Écrivez le nombre total de bouteilles ou ampoules ou sachets décrits à la question 7a)<br><br>Il y a [ ][ ][ ][ ][ ] bouteilles ou ampoules ou sachets en stock | <b>9a. Quantité vendue au cours des 7 derniers jours</b><br>(Écrivez le nombre de bouteilles ou ampoules ou sachets décrits à la question 7a)<br><br>Ce point de vente a vendu [ ][ ][ ][ ] bouteilles ou ampoules ou sachets au cours des <u>7 derniers jours</u> | <b>10a. Avez-vous connu une rupture de stock de cet antipaludique au cours des 3 derniers mois?</b><br><br>1 = Oui<br>0 = Non<br>99 = Ne sait pas         | <b>11a. Prix de vente au détail</b><br>[ ][ ] bouteilles ou ampoules ou sachets pour: [ ][ ][ ][ ] FCFA<br><br>(Si gratuit écrire 00000 comme prix) | <b>N2a. Prix de gros</b><br>Achat de gros le plus récent du point de vente :<br>[ ][ ][ ][ ] bouteilles /ampoules/ sachets pour un coût de [ ][ ][ ][ ][ ] FCFA | <b>N2aa. Quantité de gros</b><br>Achat de gros le plus récent du point de vente :<br><br>[ ][ ][ ][ ][ ] bouteilles/ampoules/sachets comme décrits en Q7a) achetés | <b>12a. Commentaire</b>                                                                                                                                                                                                                                                            |

|                                                                                                                                                                                                  |                                                                                                                                                                                                                                                                    |                                                                                                                                                           |                                                                                                                                                     |                                                                                                                                                                |                                                                                                                                                                    |                                                                                                                                                                                                                                                                                    |
|--------------------------------------------------------------------------------------------------------------------------------------------------------------------------------------------------|--------------------------------------------------------------------------------------------------------------------------------------------------------------------------------------------------------------------------------------------------------------------|-----------------------------------------------------------------------------------------------------------------------------------------------------------|-----------------------------------------------------------------------------------------------------------------------------------------------------|----------------------------------------------------------------------------------------------------------------------------------------------------------------|--------------------------------------------------------------------------------------------------------------------------------------------------------------------|------------------------------------------------------------------------------------------------------------------------------------------------------------------------------------------------------------------------------------------------------------------------------------|
| <b>1b. Nom générique</b>                                                                                                                                                                         | <b>2b. Dosage</b><br>[ ][ ][ ][ ]mg/[ ][ ][ ][ ]mL                                                                                                                                                                                                                 | <b>3b. Présentation</b><br>3 = Sirop<br>4 = Suspension<br>5 = Liquide injectable<br>6 = Poudre injectable<br>7 = Granule<br>8 = Autre<br>(précisez) _____ | <b>4b. Nom de Marque</b>                                                                                                                            | <b>5b. Fabricant</b>                                                                                                                                           | <b>6b. L'antipaludique est-il expiré?</b><br>1 = Oui<br><br>0 = Non<br><br>99 = Ne sait pas                                                                        | <b>7b. Taille de l'emballage</b><br>(Écrire le nombre <u>et</u> Encercler le type)<br>Il y un total de [ ][ ][ ][ ] mL<br>(ou mg pour les granules et la poudre injectable) dans chaque:(Encercler le type d'emballage):<br>1 = Bouteille<br>2 = Ampoule<br>3 = Sachet de Granules |
|                                                                                                                                                                                                  | [ ][ ][ ][ ]mg/[ ][ ][ ][ ]mL                                                                                                                                                                                                                                      |                                                                                                                                                           |                                                                                                                                                     | <b>5bb. Pays de fabrication</b>                                                                                                                                |                                                                                                                                                                    |                                                                                                                                                                                                                                                                                    |
|                                                                                                                                                                                                  | [ ][ ][ ][ ]mg/[ ][ ][ ][ ]mL<br>(Note : ne pas saisir de mL pour les poudres et les granules)                                                                                                                                                                     |                                                                                                                                                           |                                                                                                                                                     |                                                                                                                                                                |                                                                                                                                                                    |                                                                                                                                                                                                                                                                                    |
| <b>8b. Quantité en stock</b><br>(Écrivez le nombre total de bouteilles ou ampoules ou sachets décrits à la question 7b)<br><br>Il y a [ ][ ][ ][ ][ ] bouteilles ou ampoules ou sachets en stock | <b>9b. Quantité vendue au cours des 7 derniers jours</b><br>(Écrivez le nombre de bouteilles ou ampoules ou sachets décrits à la question 7b)<br><br>Ce point de vente a vendu [ ][ ][ ][ ] bouteilles ou ampoules ou sachets au cours des <u>7 derniers jours</u> | <b>10b. Avez-vous connu une rupture de stock de cet antipaludique au cours des 3 derniers mois?</b><br><br>1 = Oui<br>0 = Non<br>99 = Ne sait pas         | <b>11b. Prix de vente au détail</b><br>[ ][ ] bouteilles ou ampoules ou sachets pour: [ ][ ][ ][ ] FCFA<br><br>(Si gratuit écrire 00000 comme prix) | <b>N2b. Prix de gros</b><br>Achat de gros le plus récent du point de vente :<br>[ ][ ][ ][ ]bouteilles /ampoules/ sachets pour un coût de [ ][ ][ ][ ][ ] FCFA | <b>N2bb. Quantité de gros</b><br>Achat de gros le plus récent du point de vente :<br><br>[ ][ ][ ][ ][ ] bouteilles/ampoules/sachets(comme décrits en Q7b) achetés | <b>12b. Commentaire</b>                                                                                                                                                                                                                                                            |

|                                                                                                                                                                                                  |                                                                                                                                                                                                                                                                    |                                                                                                                                                           |                                                                                                                                                     |                                                                                                                                                                |                                                                                                                                                                    |                                                                                                                                                                                                                                                                                     |
|--------------------------------------------------------------------------------------------------------------------------------------------------------------------------------------------------|--------------------------------------------------------------------------------------------------------------------------------------------------------------------------------------------------------------------------------------------------------------------|-----------------------------------------------------------------------------------------------------------------------------------------------------------|-----------------------------------------------------------------------------------------------------------------------------------------------------|----------------------------------------------------------------------------------------------------------------------------------------------------------------|--------------------------------------------------------------------------------------------------------------------------------------------------------------------|-------------------------------------------------------------------------------------------------------------------------------------------------------------------------------------------------------------------------------------------------------------------------------------|
| <b>1c. Nom générique</b>                                                                                                                                                                         | <b>2c. Dosage</b><br>[ ][ ][ ][ ]mg/[ ][ ][ ][ ]mL                                                                                                                                                                                                                 | <b>3c. Présentation</b><br>3 = Sirop<br>4 = Suspension<br>5 = Liquide injectable<br>6 = Poudre injectable<br>7 = Granule<br>8 = Autre<br>(précisez) _____ | <b>4c. Nom de Marque</b>                                                                                                                            | <b>5c. Fabricant</b>                                                                                                                                           | <b>6c. L'antipaludique est-il expiré?</b><br>1 = Oui<br><br>0 = Non<br><br>99 = Ne sait pas                                                                        | <b>7c. Taille de l'emballage</b><br>(Écrire le nombre <u>et</u> Encercler le type)<br>Il y un total de [ ][ ][ ][ ] mL<br>(ou mg pour les granules et la poudre injectable) dans chaque: (Encercler le type d'emballage):<br>1 = Bouteille<br>2 = Ampoule<br>3 = Sachet de Granules |
|                                                                                                                                                                                                  | [ ][ ][ ][ ]mg/[ ][ ][ ][ ]mL                                                                                                                                                                                                                                      |                                                                                                                                                           |                                                                                                                                                     | <b>5cc. Pays de fabrication</b>                                                                                                                                |                                                                                                                                                                    |                                                                                                                                                                                                                                                                                     |
|                                                                                                                                                                                                  | [ ][ ][ ][ ]mg/[ ][ ][ ][ ]mL<br>mL (Note : ne pas saisir de mL pour les poudres et les granules)                                                                                                                                                                  |                                                                                                                                                           |                                                                                                                                                     |                                                                                                                                                                |                                                                                                                                                                    |                                                                                                                                                                                                                                                                                     |
| <b>8c. Quantité en stock</b><br>(Écrivez le nombre total de bouteilles ou ampoules ou sachets décrits à la question 7c)<br><br>Il y a [ ][ ][ ][ ][ ] bouteilles ou ampoules ou sachets en stock | <b>9c. Quantité vendue au cours des 7 derniers jours</b><br>(Écrivez le nombre de bouteilles ou ampoules ou sachets décrits à la question 7c)<br><br>Ce point de vente a vendu [ ][ ][ ][ ] bouteilles ou ampoules ou sachets au cours des <u>7 derniers jours</u> | <b>10c. Avez-vous connu une rupture de stock de cet antipaludique au cours des 3 derniers mois?</b><br><br>1 = Oui<br>0 = Non<br>99 = Ne sait pas         | <b>11c. Prix de vente au détail</b><br>[ ][ ] bouteilles ou ampoules ou sachets pour: [ ][ ][ ][ ] FCFA<br><br>(Si gratuit écrire 00000 comme prix) | <b>N2c. Prix de gros</b><br>Achat de gros le plus récent du point de vente :<br>[ ][ ][ ][ ]bouteilles /ampoules/ sachets pour un coût de [ ][ ][ ][ ][ ] FCFA | <b>N2cc. Quantité de gros</b><br>Achat de gros le plus récent du point de vente :<br><br>[ ][ ][ ][ ][ ] bouteilles/ampoules/sachets(comme décrits en Q7c) achetés | <b>12c. Commentaire</b>                                                                                                                                                                                                                                                             |

**FICHE D'AUDIT DU MÉDICAMENT AUTRE QUE COMPRIME** (pour sirops, suspensions, liquides et poudres injectables, granules, et autres) Enq-Com-Arrond-PDV: [ ][ ][ ]-[ ][ ][ ]-[ ][ ][ ]-[ ][ ][ ]

|                                                                                                                                                                                                  |                                                                                                                                                                                                                                                                    |                                                                                                                                                           |                                                                                                                                                     |                                                                                                                                                                 |                                                                                                                                                                    |                                                                                                                                                                                                                                                                                     |
|--------------------------------------------------------------------------------------------------------------------------------------------------------------------------------------------------|--------------------------------------------------------------------------------------------------------------------------------------------------------------------------------------------------------------------------------------------------------------------|-----------------------------------------------------------------------------------------------------------------------------------------------------------|-----------------------------------------------------------------------------------------------------------------------------------------------------|-----------------------------------------------------------------------------------------------------------------------------------------------------------------|--------------------------------------------------------------------------------------------------------------------------------------------------------------------|-------------------------------------------------------------------------------------------------------------------------------------------------------------------------------------------------------------------------------------------------------------------------------------|
| <b>1a. Nom générique</b>                                                                                                                                                                         | <b>2a. Dosage</b><br>[ ][ ][ ][ ] , [ ] mg / [ ][ ][ ][ ] , [ ] mL                                                                                                                                                                                                 | <b>3a. Présentation</b><br>3 = Sirop<br>4 = Suspension<br>5 = Liquide injectable<br>6 = Poudre injectable<br>7 = Granule<br>8 = Autre<br>(précisez) _____ | <b>4a. Nom de Marque</b>                                                                                                                            | <b>5a. Fabricant</b>                                                                                                                                            | <b>6a. L'antipaludique est-il expiré?</b><br>1 = Oui<br><br>0 = Non<br><br>99 = Ne sait pas                                                                        | <b>7a. Taille de l'emballage</b><br>(Écrire le nombre <u>et</u> Encerclez le type)<br>Il y un total de [ ][ ][ ][ ] mL<br>(ou mg pour les granules et la poudre injectable) dans chaque: (Encerclez le type d'emballage):<br>1 = Bouteille<br>2 = Ampoule<br>3 = Sachet de Granules |
|                                                                                                                                                                                                  | [ ][ ][ ][ ] , [ ] mg / [ ][ ][ ][ ] , [ ] mL                                                                                                                                                                                                                      |                                                                                                                                                           |                                                                                                                                                     | <b>5aa. Pays de fabrication</b>                                                                                                                                 |                                                                                                                                                                    |                                                                                                                                                                                                                                                                                     |
|                                                                                                                                                                                                  | [ ][ ][ ][ ] , [ ] mg / [ ][ ][ ][ ] , [ ] mL<br>(Note : ne pas saisir de mL pour les poudres et les granules)                                                                                                                                                     |                                                                                                                                                           |                                                                                                                                                     |                                                                                                                                                                 |                                                                                                                                                                    |                                                                                                                                                                                                                                                                                     |
| <b>8a. Quantité en stock</b><br>(Écrivez le nombre total de bouteilles ou ampoules ou sachets décrits à la question 7a)<br><br>Il y a [ ][ ][ ][ ][ ] bouteilles ou ampoules ou sachets en stock | <b>9a. Quantité vendue au cours des 7 derniers jours</b><br>(Écrivez le nombre de bouteilles ou ampoules ou sachets décrits à la question 7a)<br><br>Ce point de vente a vendu [ ][ ][ ][ ] bouteilles ou ampoules ou sachets au cours des <u>7 derniers jours</u> | <b>10a. Avez-vous connu une rupture de stock de cet antipaludique au cours des 3 derniers mois?</b><br><br>1 = Oui<br>0 = Non<br>99 = Ne sait pas         | <b>11a. Prix de vente au détail</b><br>[ ][ ] bouteilles ou ampoules ou sachets pour: [ ][ ][ ][ ] FCFA<br><br>(Si gratuit écrire 00000 comme prix) | <b>N2a. Prix de gros</b><br>Achat de gros le plus récent du point de vente :<br>[ ][ ][ ][ ] bouteilles /ampoules/ sachets pour un coût de [ ][ ][ ][ ][ ] FCFA | <b>N2aa. Quantité de gros</b><br>Achat de gros le plus récent du point de vente :<br><br>[ ][ ][ ][ ][ ] bouteilles/ampoules/sachets comme décrits en Q7a) achetés | <b>12a. Commentaire</b>                                                                                                                                                                                                                                                             |

|                                                                                                                                                                                                  |                                                                                                                                                                                                                                                                    |                                                                                                                                                           |                                                                                                                                                     |                                                                                                                                                                 |                                                                                                                                                                     |                                                                                                                                                                                                                                                                                     |
|--------------------------------------------------------------------------------------------------------------------------------------------------------------------------------------------------|--------------------------------------------------------------------------------------------------------------------------------------------------------------------------------------------------------------------------------------------------------------------|-----------------------------------------------------------------------------------------------------------------------------------------------------------|-----------------------------------------------------------------------------------------------------------------------------------------------------|-----------------------------------------------------------------------------------------------------------------------------------------------------------------|---------------------------------------------------------------------------------------------------------------------------------------------------------------------|-------------------------------------------------------------------------------------------------------------------------------------------------------------------------------------------------------------------------------------------------------------------------------------|
| <b>1b. Nom générique</b>                                                                                                                                                                         | <b>2b. Dosage</b><br>[ ][ ][ ][ ] , [ ] mg / [ ][ ][ ][ ] , [ ] mL                                                                                                                                                                                                 | <b>3b. Présentation</b><br>3 = Sirop<br>4 = Suspension<br>5 = Liquide injectable<br>6 = Poudre injectable<br>7 = Granule<br>8 = Autre<br>(précisez) _____ | <b>4b. Nom de Marque</b>                                                                                                                            | <b>5b. Fabricant</b>                                                                                                                                            | <b>6b. L'antipaludique est-il expiré?</b><br>1 = Oui<br><br>0 = Non<br><br>99 = Ne sait pas                                                                         | <b>7b. Taille de l'emballage</b><br>(Écrire le nombre <u>et</u> Encerclez le type)<br>Il y un total de [ ][ ][ ][ ] mL<br>(ou mg pour les granules et la poudre injectable) dans chaque: (Encerclez le type d'emballage):<br>1 = Bouteille<br>2 = Ampoule<br>3 = Sachet de Granules |
|                                                                                                                                                                                                  | [ ][ ][ ][ ] , [ ] mg / [ ][ ][ ][ ] , [ ] mL                                                                                                                                                                                                                      |                                                                                                                                                           |                                                                                                                                                     | <b>5bb. Pays de fabrication</b>                                                                                                                                 |                                                                                                                                                                     |                                                                                                                                                                                                                                                                                     |
|                                                                                                                                                                                                  | [ ][ ][ ][ ] , [ ] mg / [ ][ ][ ][ ] , [ ] mL<br>(Note : ne pas saisir de mL pour les poudres et les granules)                                                                                                                                                     |                                                                                                                                                           |                                                                                                                                                     |                                                                                                                                                                 |                                                                                                                                                                     |                                                                                                                                                                                                                                                                                     |
| <b>8b. Quantité en stock</b><br>(Écrivez le nombre total de bouteilles ou ampoules ou sachets décrits à la question 7b)<br><br>Il y a [ ][ ][ ][ ][ ] bouteilles ou ampoules ou sachets en stock | <b>9b. Quantité vendue au cours des 7 derniers jours</b><br>(Écrivez le nombre de bouteilles ou ampoules ou sachets décrits à la question 7b)<br><br>Ce point de vente a vendu [ ][ ][ ][ ] bouteilles ou ampoules ou sachets au cours des <u>7 derniers jours</u> | <b>10b. Avez-vous connu une rupture de stock de cet antipaludique au cours des 3 derniers mois?</b><br><br>1 = Oui<br>0 = Non<br>99 = Ne sait pas         | <b>11b. Prix de vente au détail</b><br>[ ][ ] bouteilles ou ampoules ou sachets pour: [ ][ ][ ][ ] FCFA<br><br>(Si gratuit écrire 00000 comme prix) | <b>N2b. Prix de gros</b><br>Achat de gros le plus récent du point de vente :<br>[ ][ ][ ][ ] bouteilles /ampoules/ sachets pour un coût de [ ][ ][ ][ ][ ] FCFA | <b>N2bb. Quantité de gros</b><br>Achat de gros le plus récent du point de vente :<br><br>[ ][ ][ ][ ][ ] bouteilles/ampoules/sachets (comme décrits en Q7b) achetés | <b>12b. Commentaire</b>                                                                                                                                                                                                                                                             |

|                                                                                                                                                                                                  |                                                                                                                                                                                                                                                                    |                                                                                                                                                           |                                                                                                                                                     |                                                                                                                                                                 |                                                                                                                                                                     |                                                                                                                                                                                                                                                                                     |
|--------------------------------------------------------------------------------------------------------------------------------------------------------------------------------------------------|--------------------------------------------------------------------------------------------------------------------------------------------------------------------------------------------------------------------------------------------------------------------|-----------------------------------------------------------------------------------------------------------------------------------------------------------|-----------------------------------------------------------------------------------------------------------------------------------------------------|-----------------------------------------------------------------------------------------------------------------------------------------------------------------|---------------------------------------------------------------------------------------------------------------------------------------------------------------------|-------------------------------------------------------------------------------------------------------------------------------------------------------------------------------------------------------------------------------------------------------------------------------------|
| <b>1c. Nom générique</b>                                                                                                                                                                         | <b>2c. Dosage</b><br>[ ][ ][ ][ ] , [ ] mg / [ ][ ][ ][ ] , [ ] mL                                                                                                                                                                                                 | <b>3c. Présentation</b><br>3 = Sirop<br>4 = Suspension<br>5 = Liquide injectable<br>6 = Poudre injectable<br>7 = Granule<br>8 = Autre<br>(précisez) _____ | <b>4c. Nom de Marque</b>                                                                                                                            | <b>5c. Fabricant</b>                                                                                                                                            | <b>6c. L'antipaludique est-il expiré?</b><br>1 = Oui<br><br>0 = Non<br><br>99 = Ne sait pas                                                                         | <b>7c. Taille de l'emballage</b><br>(Écrire le nombre <u>et</u> Encerclez le type)<br>Il y un total de [ ][ ][ ][ ] mL<br>(ou mg pour les granules et la poudre injectable) dans chaque: (Encerclez le type d'emballage):<br>1 = Bouteille<br>2 = Ampoule<br>3 = Sachet de Granules |
|                                                                                                                                                                                                  | [ ][ ][ ][ ] , [ ] mg / [ ][ ][ ][ ] , [ ] mL                                                                                                                                                                                                                      |                                                                                                                                                           |                                                                                                                                                     | <b>5cc. Pays de fabrication</b>                                                                                                                                 |                                                                                                                                                                     |                                                                                                                                                                                                                                                                                     |
|                                                                                                                                                                                                  | [ ][ ][ ][ ] , [ ] mg / [ ][ ][ ][ ] , [ ] mL<br>(Note : ne pas saisir de mL pour les poudres et les granules)                                                                                                                                                     |                                                                                                                                                           |                                                                                                                                                     |                                                                                                                                                                 |                                                                                                                                                                     |                                                                                                                                                                                                                                                                                     |
| <b>8c. Quantité en stock</b><br>(Écrivez le nombre total de bouteilles ou ampoules ou sachets décrits à la question 7c)<br><br>Il y a [ ][ ][ ][ ][ ] bouteilles ou ampoules ou sachets en stock | <b>9c. Quantité vendue au cours des 7 derniers jours</b><br>(Écrivez le nombre de bouteilles ou ampoules ou sachets décrits à la question 7c)<br><br>Ce point de vente a vendu [ ][ ][ ][ ] bouteilles ou ampoules ou sachets au cours des <u>7 derniers jours</u> | <b>10c. Avez-vous connu une rupture de stock de cet antipaludique au cours des 3 derniers mois?</b><br><br>1 = Oui<br>0 = Non<br>99 = Ne sait pas         | <b>11c. Prix de vente au détail</b><br>[ ][ ] bouteilles ou ampoules ou sachets pour: [ ][ ][ ][ ] FCFA<br><br>(Si gratuit écrire 00000 comme prix) | <b>N2c. Prix de gros</b><br>Achat de gros le plus récent du point de vente :<br>[ ][ ][ ][ ] bouteilles /ampoules/ sachets pour un coût de [ ][ ][ ][ ][ ] FCFA | <b>N2cc. Quantité de gros</b><br>Achat de gros le plus récent du point de vente :<br><br>[ ][ ][ ][ ][ ] bouteilles/ampoules/sachets (comme décrits en Q7c) achetés | <b>12c. Commentaire</b>                                                                                                                                                                                                                                                             |

**FICHE D'AUDIT DU MÉDICAMENT AUTRE QUE COMPRIME** (pour sirops, suspensions, liquides et poudres injectables, granules, et autres) Enq-Com-Arrond-PDV: [ ][ ][ ]-[ ][ ][ ]-[ ][ ][ ]-[ ][ ][ ]

|                                                                                                                                                                                                  |                                                                                                                                                                                                                                                                    |                                                                                                                                                           |                                                                                                                                                     |                                                                                                                                                                 |                                                                                                                                                                    |                                                                                                                                                                                                                                                                                     |
|--------------------------------------------------------------------------------------------------------------------------------------------------------------------------------------------------|--------------------------------------------------------------------------------------------------------------------------------------------------------------------------------------------------------------------------------------------------------------------|-----------------------------------------------------------------------------------------------------------------------------------------------------------|-----------------------------------------------------------------------------------------------------------------------------------------------------|-----------------------------------------------------------------------------------------------------------------------------------------------------------------|--------------------------------------------------------------------------------------------------------------------------------------------------------------------|-------------------------------------------------------------------------------------------------------------------------------------------------------------------------------------------------------------------------------------------------------------------------------------|
| <b>1a. Nom générique</b>                                                                                                                                                                         | <b>2a. Dosage</b><br>[ ][ ][ ][ ] , [ ][ ] mg / [ ][ ][ ][ ] , [ ][ ] mL                                                                                                                                                                                           | <b>3a. Présentation</b><br>3 = Sirop<br>4 = Suspension<br>5 = Liquide injectable<br>6 = Poudre injectable<br>7 = Granule<br>8 = Autre<br>(précisez) _____ | <b>4a. Nom de Marque</b>                                                                                                                            | <b>5a. Fabricant</b>                                                                                                                                            | <b>6a. L'antipaludique est-il expiré?</b><br>1 = Oui<br><br>0 = Non<br><br>99 = Ne sait pas                                                                        | <b>7a. Taille de l'emballage</b><br>(Ecrire le nombre <u>et</u> Encercler le type)<br>Il y un total de [ ][ ][ ][ ] mL<br>(ou mg pour les granules et la poudre injectable) dans chaque: (Encercler le type d'emballage):<br>1 = Bouteille<br>2 = Ampoule<br>3 = Sachet de Granules |
|                                                                                                                                                                                                  | [ ][ ][ ][ ] , [ ][ ] mg / [ ][ ][ ][ ] , [ ][ ] mL                                                                                                                                                                                                                |                                                                                                                                                           |                                                                                                                                                     | <b>5aa. Pays de fabrication</b>                                                                                                                                 |                                                                                                                                                                    |                                                                                                                                                                                                                                                                                     |
|                                                                                                                                                                                                  | [ ][ ][ ][ ] , [ ][ ] mg / [ ][ ][ ][ ] , [ ][ ] mL<br>(Note : ne pas saisir de mL pour les poudres et les granules)                                                                                                                                               |                                                                                                                                                           |                                                                                                                                                     |                                                                                                                                                                 |                                                                                                                                                                    |                                                                                                                                                                                                                                                                                     |
| <b>8a. Quantité en stock</b><br>(Ecrivez le nombre total de bouteilles ou ampoules ou sachets décrits à la question 7a)<br><br>Il y a [ ][ ][ ][ ][ ] bouteilles ou ampoules ou sachets en stock | <b>9a. Quantité vendue au cours des 7 derniers jours</b><br>(Ecrivez le nombre de bouteilles ou ampoules ou sachets décrits à la question 7a)<br><br>Ce point de vente a vendu [ ][ ][ ][ ] bouteilles ou ampoules ou sachets au cours des <u>7 derniers jours</u> | <b>10a. Avez-vous connu une rupture de stock de cet antipaludique au cours des 3 derniers mois?</b><br><br>1 = Oui<br>0 = Non<br>99 = Ne sait pas         | <b>11a. Prix de vente au détail</b><br>[ ][ ] bouteilles ou ampoules ou sachets pour: [ ][ ][ ][ ] FCFA<br><br>(Si gratuit écrire 00000 comme prix) | <b>N2a. Prix de gros</b><br>Achat de gros le plus récent du point de vente :<br>[ ][ ][ ][ ] bouteilles /ampoules/ sachets pour un coût de [ ][ ][ ][ ][ ] FCFA | <b>N2aa. Quantité de gros</b><br>Achat de gros le plus récent du point de vente :<br><br>[ ][ ][ ][ ][ ] bouteilles/ampoules/sachets comme décrits en Q7a) achetés | <b>12a.</b><br>Commentaire                                                                                                                                                                                                                                                          |

|                                                                                                                                                                                                  |                                                                                                                                                                                                                                                                    |                                                                                                                                                           |                                                                                                                                                     |                                                                                                                                                                 |                                                                                                                                                                     |                                                                                                                                                                                                                                                                                     |
|--------------------------------------------------------------------------------------------------------------------------------------------------------------------------------------------------|--------------------------------------------------------------------------------------------------------------------------------------------------------------------------------------------------------------------------------------------------------------------|-----------------------------------------------------------------------------------------------------------------------------------------------------------|-----------------------------------------------------------------------------------------------------------------------------------------------------|-----------------------------------------------------------------------------------------------------------------------------------------------------------------|---------------------------------------------------------------------------------------------------------------------------------------------------------------------|-------------------------------------------------------------------------------------------------------------------------------------------------------------------------------------------------------------------------------------------------------------------------------------|
| <b>1b. Nom générique</b>                                                                                                                                                                         | <b>2b. Dosage</b><br>[ ][ ][ ][ ] , [ ][ ] mg / [ ][ ][ ][ ] , [ ][ ] mL                                                                                                                                                                                           | <b>3b. Présentation</b><br>3 = Sirop<br>4 = Suspension<br>5 = Liquide injectable<br>6 = Poudre injectable<br>7 = Granule<br>8 = Autre<br>(précisez) _____ | <b>4b. Nom de Marque</b>                                                                                                                            | <b>5b. Fabricant</b>                                                                                                                                            | <b>6b. L'antipaludique est-il expiré?</b><br>1 = Oui<br><br>0 = Non<br><br>99 = Ne sait pas                                                                         | <b>7b. Taille de l'emballage</b><br>(Ecrire le nombre <u>et</u> Encercler le type)<br>Il y un total de [ ][ ][ ][ ] mL<br>(ou mg pour les granules et la poudre injectable) dans chaque: (Encercler le type d'emballage):<br>1 = Bouteille<br>2 = Ampoule<br>3 = Sachet de Granules |
|                                                                                                                                                                                                  | [ ][ ][ ][ ] , [ ][ ] mg / [ ][ ][ ][ ] , [ ][ ] mL                                                                                                                                                                                                                |                                                                                                                                                           |                                                                                                                                                     | <b>5bb. Pays de fabrication</b>                                                                                                                                 |                                                                                                                                                                     |                                                                                                                                                                                                                                                                                     |
|                                                                                                                                                                                                  | [ ][ ][ ][ ] , [ ][ ] mg / [ ][ ][ ][ ] , [ ][ ] mL<br>(Note : ne pas saisir de mL pour les poudres et les granules)                                                                                                                                               |                                                                                                                                                           |                                                                                                                                                     |                                                                                                                                                                 |                                                                                                                                                                     |                                                                                                                                                                                                                                                                                     |
| <b>8b. Quantité en stock</b><br>(Ecrivez le nombre total de bouteilles ou ampoules ou sachets décrits à la question 7b)<br><br>Il y a [ ][ ][ ][ ][ ] bouteilles ou ampoules ou sachets en stock | <b>9b. Quantité vendue au cours des 7 derniers jours</b><br>(Ecrivez le nombre de bouteilles ou ampoules ou sachets décrits à la question 7b)<br><br>Ce point de vente a vendu [ ][ ][ ][ ] bouteilles ou ampoules ou sachets au cours des <u>7 derniers jours</u> | <b>10b. Avez-vous connu une rupture de stock de cet antipaludique au cours des 3 derniers mois?</b><br><br>1 = Oui<br>0 = Non<br>99 = Ne sait pas         | <b>11b. Prix de vente au détail</b><br>[ ][ ] bouteilles ou ampoules ou sachets pour: [ ][ ][ ][ ] FCFA<br><br>(Si gratuit écrire 00000 comme prix) | <b>N2b. Prix de gros</b><br>Achat de gros le plus récent du point de vente :<br>[ ][ ][ ][ ] bouteilles /ampoules/ sachets pour un coût de [ ][ ][ ][ ][ ] FCFA | <b>N2bb. Quantité de gros</b><br>Achat de gros le plus récent du point de vente :<br><br>[ ][ ][ ][ ][ ] bouteilles/ampoules/sachets (comme décrits en Q7b) achetés | <b>12b.</b><br>Commentaire                                                                                                                                                                                                                                                          |

|                                                                                                                                                                                                  |                                                                                                                                                                                                                                                                    |                                                                                                                                                           |                                                                                                                                                     |                                                                                                                                                                 |                                                                                                                                                                     |                                                                                                                                                                                                                                                                                     |
|--------------------------------------------------------------------------------------------------------------------------------------------------------------------------------------------------|--------------------------------------------------------------------------------------------------------------------------------------------------------------------------------------------------------------------------------------------------------------------|-----------------------------------------------------------------------------------------------------------------------------------------------------------|-----------------------------------------------------------------------------------------------------------------------------------------------------|-----------------------------------------------------------------------------------------------------------------------------------------------------------------|---------------------------------------------------------------------------------------------------------------------------------------------------------------------|-------------------------------------------------------------------------------------------------------------------------------------------------------------------------------------------------------------------------------------------------------------------------------------|
| <b>1c. Nom générique</b>                                                                                                                                                                         | <b>2c. Dosage</b><br>[ ][ ][ ][ ] , [ ][ ] mg / [ ][ ][ ][ ] , [ ][ ] mL                                                                                                                                                                                           | <b>3c. Présentation</b><br>3 = Sirop<br>4 = Suspension<br>5 = Liquide injectable<br>6 = Poudre injectable<br>7 = Granule<br>8 = Autre<br>(précisez) _____ | <b>4c. Nom de Marque</b>                                                                                                                            | <b>5c. Fabricant</b>                                                                                                                                            | <b>6c. L'antipaludique est-il expiré?</b><br>1 = Oui<br><br>0 = Non<br><br>99 = Ne sait pas                                                                         | <b>7c. Taille de l'emballage</b><br>(Ecrire le nombre <u>et</u> Encercler le type)<br>Il y un total de [ ][ ][ ][ ] mL<br>(ou mg pour les granules et la poudre injectable) dans chaque: (Encercler le type d'emballage):<br>1 = Bouteille<br>2 = Ampoule<br>3 = Sachet de Granules |
|                                                                                                                                                                                                  | [ ][ ][ ][ ] , [ ][ ] mg / [ ][ ][ ][ ] , [ ][ ] mL                                                                                                                                                                                                                |                                                                                                                                                           |                                                                                                                                                     | <b>5cc. Pays de fabrication</b>                                                                                                                                 |                                                                                                                                                                     |                                                                                                                                                                                                                                                                                     |
|                                                                                                                                                                                                  | [ ][ ][ ][ ] , [ ][ ] mg / [ ][ ][ ][ ] , [ ][ ] mL<br>(Note : ne pas saisir de mL pour les poudres et les granules)                                                                                                                                               |                                                                                                                                                           |                                                                                                                                                     |                                                                                                                                                                 |                                                                                                                                                                     |                                                                                                                                                                                                                                                                                     |
| <b>8c. Quantité en stock</b><br>(Ecrivez le nombre total de bouteilles ou ampoules ou sachets décrits à la question 7c)<br><br>Il y a [ ][ ][ ][ ][ ] bouteilles ou ampoules ou sachets en stock | <b>9c. Quantité vendue au cours des 7 derniers jours</b><br>(Ecrivez le nombre de bouteilles ou ampoules ou sachets décrits à la question 7c)<br><br>Ce point de vente a vendu [ ][ ][ ][ ] bouteilles ou ampoules ou sachets au cours des <u>7 derniers jours</u> | <b>10c. Avez-vous connu une rupture de stock de cet antipaludique au cours des 3 derniers mois?</b><br><br>1 = Oui<br>0 = Non<br>99 = Ne sait pas         | <b>11c. Prix de vente au détail</b><br>[ ][ ] bouteilles ou ampoules ou sachets pour: [ ][ ][ ][ ] FCFA<br><br>(Si gratuit écrire 00000 comme prix) | <b>N2c. Prix de gros</b><br>Achat de gros le plus récent du point de vente :<br>[ ][ ][ ][ ] bouteilles /ampoules/ sachets pour un coût de [ ][ ][ ][ ][ ] FCFA | <b>N2cc. Quantité de gros</b><br>Achat de gros le plus récent du point de vente :<br><br>[ ][ ][ ][ ][ ] bouteilles/ampoules/sachets (comme décrits en Q7c) achetés | <b>12c.</b><br>Commentaire                                                                                                                                                                                                                                                          |

**FICHE D'AUDIT DU MÉDICAMENT AUTRE QUE COMPRIME** (pour sirops, suspensions, liquides et poudres injectables, granules, et autres) Enq-Com-Arrond-PDV: [ ][ ][ ]-[ ][ ][ ]-[ ][ ][ ]-[ ][ ][ ]

|                                                                                                                                                                                                  |                                                                                                                                                                                                                                                                    |                                                                                                                                                           |                                                                                                                                                     |                                                                                                                                                                 |                                                                                                                                                                     |                                                                                                                                                                                                                                                                                     |
|--------------------------------------------------------------------------------------------------------------------------------------------------------------------------------------------------|--------------------------------------------------------------------------------------------------------------------------------------------------------------------------------------------------------------------------------------------------------------------|-----------------------------------------------------------------------------------------------------------------------------------------------------------|-----------------------------------------------------------------------------------------------------------------------------------------------------|-----------------------------------------------------------------------------------------------------------------------------------------------------------------|---------------------------------------------------------------------------------------------------------------------------------------------------------------------|-------------------------------------------------------------------------------------------------------------------------------------------------------------------------------------------------------------------------------------------------------------------------------------|
| <b>1a. Nom générique</b>                                                                                                                                                                         | <b>2a. Dosage</b><br>[ ][ ][ ][ ] , [ ][ ] mg / [ ][ ][ ][ ] , [ ][ ] mL                                                                                                                                                                                           | <b>3a. Présentation</b><br>3 = Sirop<br>4 = Suspension<br>5 = Liquide injectable<br>6 = Poudre injectable<br>7 = Granule<br>8 = Autre<br>(précisez) _____ | <b>4a. Nom de Marque</b>                                                                                                                            | <b>5a. Fabricant</b>                                                                                                                                            | <b>6a. L'antipaludique est-il expiré?</b><br>1 = Oui<br><br>0 = Non<br><br>99 = Ne sait pas                                                                         | <b>7a. Taille de l'emballage</b><br>(Ecrire le nombre <u>et</u> Encerclez le type)<br>Il y un total de [ ][ ][ ][ ] mL<br>(ou mg pour les granules et la poudre injectable) dans chaque: (Encerclez le type d'emballage):<br>1 = Bouteille<br>2 = Ampoule<br>3 = Sachet de Granules |
|                                                                                                                                                                                                  | [ ][ ][ ][ ] , [ ][ ] mg / [ ][ ][ ][ ] , [ ][ ] mL                                                                                                                                                                                                                |                                                                                                                                                           |                                                                                                                                                     | <b>5aa. Pays de fabrication</b>                                                                                                                                 |                                                                                                                                                                     |                                                                                                                                                                                                                                                                                     |
|                                                                                                                                                                                                  | [ ][ ][ ][ ] , [ ][ ] mg / [ ][ ][ ][ ] , [ ][ ] mL<br>(Note : ne pas saisir de mL pour les poudres et les granules)                                                                                                                                               |                                                                                                                                                           |                                                                                                                                                     |                                                                                                                                                                 |                                                                                                                                                                     |                                                                                                                                                                                                                                                                                     |
| <b>8a. Quantité en stock</b><br>(Ecrivez le nombre total de bouteilles ou ampoules ou sachets décrits à la question 7a)<br><br>Il y a [ ][ ][ ][ ][ ] bouteilles ou ampoules ou sachets en stock | <b>9a. Quantité vendue au cours des 7 derniers jours</b><br>(Ecrivez le nombre de bouteilles ou ampoules ou sachets décrits à la question 7a)<br><br>Ce point de vente a vendu [ ][ ][ ][ ] bouteilles ou ampoules ou sachets au cours des <u>7 derniers jours</u> | <b>10a. Avez-vous connu une rupture de stock de cet antipaludique au cours des 3 derniers mois?</b><br><br>1 = Oui<br>0 = Non<br>99 = Ne sait pas         | <b>11a. Prix de vente au détail</b><br>[ ][ ] bouteilles ou ampoules ou sachets pour: [ ][ ][ ][ ] FCFA<br><br>(Si gratuit écrire 00000 comme prix) | <b>N2a. Prix de gros</b><br>Achat de gros le plus récent du point de vente :<br>[ ][ ][ ][ ] bouteilles /ampoules/ sachets pour un coût de [ ][ ][ ][ ][ ] FCFA | <b>N2aa. Quantité de gros</b><br>Achat de gros le plus récent du point de vente :<br><br>[ ][ ][ ][ ][ ] bouteilles/ ampoules/sachets comme décrits en Q7a) achetés | <b>12a.</b><br>Commentaire                                                                                                                                                                                                                                                          |

|                                                                                                                                                                                                  |                                                                                                                                                                                                                                                                    |                                                                                                                                                           |                                                                                                                                                     |                                                                                                                                                                 |                                                                                                                                                                     |                                                                                                                                                                                                                                                                                     |
|--------------------------------------------------------------------------------------------------------------------------------------------------------------------------------------------------|--------------------------------------------------------------------------------------------------------------------------------------------------------------------------------------------------------------------------------------------------------------------|-----------------------------------------------------------------------------------------------------------------------------------------------------------|-----------------------------------------------------------------------------------------------------------------------------------------------------|-----------------------------------------------------------------------------------------------------------------------------------------------------------------|---------------------------------------------------------------------------------------------------------------------------------------------------------------------|-------------------------------------------------------------------------------------------------------------------------------------------------------------------------------------------------------------------------------------------------------------------------------------|
| <b>1b. Nom générique</b>                                                                                                                                                                         | <b>2b. Dosage</b><br>[ ][ ][ ][ ] , [ ][ ] mg / [ ][ ][ ][ ] , [ ][ ] mL                                                                                                                                                                                           | <b>3b. Présentation</b><br>3 = Sirop<br>4 = Suspension<br>5 = Liquide injectable<br>6 = Poudre injectable<br>7 = Granule<br>8 = Autre<br>(précisez) _____ | <b>4b. Nom de Marque</b>                                                                                                                            | <b>5b. Fabricant</b>                                                                                                                                            | <b>6b. L'antipaludique est-il expiré?</b><br>1 = Oui<br><br>0 = Non<br><br>99 = Ne sait pas                                                                         | <b>7b. Taille de l'emballage</b><br>(Ecrire le nombre <u>et</u> Encerclez le type)<br>Il y un total de [ ][ ][ ][ ] mL<br>(ou mg pour les granules et la poudre injectable) dans chaque: (Encerclez le type d'emballage):<br>1 = Bouteille<br>2 = Ampoule<br>3 = Sachet de Granules |
|                                                                                                                                                                                                  | [ ][ ][ ][ ] , [ ][ ] mg / [ ][ ][ ][ ] , [ ][ ] mL                                                                                                                                                                                                                |                                                                                                                                                           |                                                                                                                                                     | <b>5bb. Pays de fabrication</b>                                                                                                                                 |                                                                                                                                                                     |                                                                                                                                                                                                                                                                                     |
|                                                                                                                                                                                                  | [ ][ ][ ][ ] , [ ][ ] mg / [ ][ ][ ][ ] , [ ][ ] mL<br>(Note : ne pas saisir de mL pour les poudres et les granules)                                                                                                                                               |                                                                                                                                                           |                                                                                                                                                     |                                                                                                                                                                 |                                                                                                                                                                     |                                                                                                                                                                                                                                                                                     |
| <b>8b. Quantité en stock</b><br>(Ecrivez le nombre total de bouteilles ou ampoules ou sachets décrits à la question 7b)<br><br>Il y a [ ][ ][ ][ ][ ] bouteilles ou ampoules ou sachets en stock | <b>9b. Quantité vendue au cours des 7 derniers jours</b><br>(Ecrivez le nombre de bouteilles ou ampoules ou sachets décrits à la question 7b)<br><br>Ce point de vente a vendu [ ][ ][ ][ ] bouteilles ou ampoules ou sachets au cours des <u>7 derniers jours</u> | <b>10b. Avez-vous connu une rupture de stock de cet antipaludique au cours des 3 derniers mois?</b><br><br>1 = Oui<br>0 = Non<br>99 = Ne sait pas         | <b>11b. Prix de vente au détail</b><br>[ ][ ] bouteilles ou ampoules ou sachets pour: [ ][ ][ ][ ] FCFA<br><br>(Si gratuit écrire 00000 comme prix) | <b>N2b. Prix de gros</b><br>Achat de gros le plus récent du point de vente :<br>[ ][ ][ ][ ] bouteilles /ampoules/ sachets pour un coût de [ ][ ][ ][ ][ ] FCFA | <b>N2bb. Quantité de gros</b><br>Achat de gros le plus récent du point de vente :<br><br>[ ][ ][ ][ ][ ] bouteilles/ampoules/sachets (comme décrits en Q7b) achetés | <b>12b.</b><br>Commentaire                                                                                                                                                                                                                                                          |

|                                                                                                                                                                                                  |                                                                                                                                                                                                                                                                    |                                                                                                                                                           |                                                                                                                                                     |                                                                                                                                                                 |                                                                                                                                                                     |                                                                                                                                                                                                                                                                                     |
|--------------------------------------------------------------------------------------------------------------------------------------------------------------------------------------------------|--------------------------------------------------------------------------------------------------------------------------------------------------------------------------------------------------------------------------------------------------------------------|-----------------------------------------------------------------------------------------------------------------------------------------------------------|-----------------------------------------------------------------------------------------------------------------------------------------------------|-----------------------------------------------------------------------------------------------------------------------------------------------------------------|---------------------------------------------------------------------------------------------------------------------------------------------------------------------|-------------------------------------------------------------------------------------------------------------------------------------------------------------------------------------------------------------------------------------------------------------------------------------|
| <b>1c. Nom générique</b>                                                                                                                                                                         | <b>2c. Dosage</b><br>[ ][ ][ ][ ] , [ ][ ] mg / [ ][ ][ ][ ] , [ ][ ] mL                                                                                                                                                                                           | <b>3c. Présentation</b><br>3 = Sirop<br>4 = Suspension<br>5 = Liquide injectable<br>6 = Poudre injectable<br>7 = Granule<br>8 = Autre<br>(précisez) _____ | <b>4c. Nom de Marque</b>                                                                                                                            | <b>5c. Fabricant</b>                                                                                                                                            | <b>6c. L'antipaludique est-il expiré?</b><br>1 = Oui<br><br>0 = Non<br><br>99 = Ne sait pas                                                                         | <b>7c. Taille de l'emballage</b><br>(Ecrire le nombre <u>et</u> Encerclez le type)<br>Il y un total de [ ][ ][ ][ ] mL<br>(ou mg pour les granules et la poudre injectable) dans chaque: (Encerclez le type d'emballage):<br>1 = Bouteille<br>2 = Ampoule<br>3 = Sachet de Granules |
|                                                                                                                                                                                                  | [ ][ ][ ][ ] , [ ][ ] mg / [ ][ ][ ][ ] , [ ][ ] mL                                                                                                                                                                                                                |                                                                                                                                                           |                                                                                                                                                     | <b>5cc. Pays de fabrication</b>                                                                                                                                 |                                                                                                                                                                     |                                                                                                                                                                                                                                                                                     |
|                                                                                                                                                                                                  | [ ][ ][ ][ ] , [ ][ ] mg / [ ][ ][ ][ ] , [ ][ ] mL<br>(Note : ne pas saisir de mL pour les poudres et les granules)                                                                                                                                               |                                                                                                                                                           |                                                                                                                                                     |                                                                                                                                                                 |                                                                                                                                                                     |                                                                                                                                                                                                                                                                                     |
| <b>8c. Quantité en stock</b><br>(Ecrivez le nombre total de bouteilles ou ampoules ou sachets décrits à la question 7c)<br><br>Il y a [ ][ ][ ][ ][ ] bouteilles ou ampoules ou sachets en stock | <b>9c. Quantité vendue au cours des 7 derniers jours</b><br>(Ecrivez le nombre de bouteilles ou ampoules ou sachets décrits à la question 7c)<br><br>Ce point de vente a vendu [ ][ ][ ][ ] bouteilles ou ampoules ou sachets au cours des <u>7 derniers jours</u> | <b>10c. Avez-vous connu une rupture de stock de cet antipaludique au cours des 3 derniers mois?</b><br><br>1 = Oui<br>0 = Non<br>99 = Ne sait pas         | <b>11c. Prix de vente au détail</b><br>[ ][ ] bouteilles ou ampoules ou sachets pour: [ ][ ][ ][ ] FCFA<br><br>(Si gratuit écrire 00000 comme prix) | <b>N2c. Prix de gros</b><br>Achat de gros le plus récent du point de vente :<br>[ ][ ][ ][ ] bouteilles /ampoules/ sachets pour un coût de [ ][ ][ ][ ][ ] FCFA | <b>N2cc. Quantité de gros</b><br>Achat de gros le plus récent du point de vente :<br><br>[ ][ ][ ][ ][ ] bouteilles/ampoules/sachets (comme décrits en Q7c) achetés | <b>12c.</b><br>Commentaire                                                                                                                                                                                                                                                          |

**FICHE D'AUDIT DU MÉDICAMENT AUTRE QUE COMPRIME** (pour sirops, suspensions, liquides et poudres injectables, granules, et autres) Enq-Com-Arrond-PDV: [ ][ ][ ]-[ ][ ][ ]-[ ][ ][ ]-[ ][ ][ ]

|                                                                                                                                                                                                  |                                                                                                                                                                                                                                                                    |                                                                                                                                                           |                                                                                                                                                     |                                                                                                                                                                 |                                                                                                                                                                    |                                                                                                                                                                                                                                                                                     |
|--------------------------------------------------------------------------------------------------------------------------------------------------------------------------------------------------|--------------------------------------------------------------------------------------------------------------------------------------------------------------------------------------------------------------------------------------------------------------------|-----------------------------------------------------------------------------------------------------------------------------------------------------------|-----------------------------------------------------------------------------------------------------------------------------------------------------|-----------------------------------------------------------------------------------------------------------------------------------------------------------------|--------------------------------------------------------------------------------------------------------------------------------------------------------------------|-------------------------------------------------------------------------------------------------------------------------------------------------------------------------------------------------------------------------------------------------------------------------------------|
| <b>1a. Nom générique</b>                                                                                                                                                                         | <b>2a. Dosage</b><br>[ ][ ][ ][ ] , [ ][ ] mg / [ ][ ][ ][ ] , [ ][ ] mL                                                                                                                                                                                           | <b>3a. Présentation</b><br>3 = Sirop<br>4 = Suspension<br>5 = Liquide injectable<br>6 = Poudre injectable<br>7 = Granule<br>8 = Autre<br>(précisez) _____ | <b>4a. Nom de Marque</b>                                                                                                                            | <b>5a. Fabricant</b>                                                                                                                                            | <b>6a. L'antipaludique est-il expiré?</b><br>1 = Oui<br><br>0 = Non<br><br>99 = Ne sait pas                                                                        | <b>7a. Taille de l'emballage</b><br>(Écrire le nombre <u>et</u> Encercler le type)<br>Il y un total de [ ][ ][ ][ ] mL<br>(ou mg pour les granules et la poudre injectable) dans chaque: (Encercler le type d'emballage):<br>1 = Bouteille<br>2 = Ampoule<br>3 = Sachet de Granules |
|                                                                                                                                                                                                  | [ ][ ][ ][ ] , [ ][ ] mg / [ ][ ][ ][ ] , [ ][ ] mL                                                                                                                                                                                                                |                                                                                                                                                           |                                                                                                                                                     |                                                                                                                                                                 |                                                                                                                                                                    |                                                                                                                                                                                                                                                                                     |
|                                                                                                                                                                                                  | [ ][ ][ ][ ] , [ ][ ] mg / [ ][ ][ ][ ] , [ ][ ] mL<br>(Note : ne pas saisir de mL pour les poudres et les granules)                                                                                                                                               |                                                                                                                                                           |                                                                                                                                                     | <b>5aa. Pays de fabrication</b>                                                                                                                                 |                                                                                                                                                                    |                                                                                                                                                                                                                                                                                     |
| <b>8a. Quantité en stock</b><br>(Écrivez le nombre total de bouteilles ou ampoules ou sachets décrits à la question 7a)<br><br>Il y a [ ][ ][ ][ ][ ] bouteilles ou ampoules ou sachets en stock | <b>9a. Quantité vendue au cours des 7 derniers jours</b><br>(Écrivez le nombre de bouteilles ou ampoules ou sachets décrits à la question 7a)<br><br>Ce point de vente a vendu [ ][ ][ ][ ] bouteilles ou ampoules ou sachets au cours des <u>7 derniers jours</u> | <b>10a. Avez-vous connu une rupture de stock de cet antipaludique au cours des 3 derniers mois?</b><br><br>1 = Oui<br>0 = Non<br>99 = Ne sait pas         | <b>11a. Prix de vente au détail</b><br>[ ][ ] bouteilles ou ampoules ou sachets pour: [ ][ ][ ][ ] FCFA<br><br>(Si gratuit écrire 00000 comme prix) | <b>N2a. Prix de gros</b><br>Achat de gros le plus récent du point de vente :<br>[ ][ ][ ][ ] bouteilles /ampoules/ sachets pour un coût de [ ][ ][ ][ ][ ] FCFA | <b>N2aa. Quantité de gros</b><br>Achat de gros le plus récent du point de vente :<br><br>[ ][ ][ ][ ][ ] bouteilles/ampoules/sachets comme décrits en Q7a) achetés | <b>12a.</b><br>Commentaire                                                                                                                                                                                                                                                          |

|                                                                                                                                                                                                  |                                                                                                                                                                                                                                                                    |                                                                                                                                                           |                                                                                                                                                     |                                                                                                                                                                 |                                                                                                                                                                    |                                                                                                                                                                                                                                                                                     |
|--------------------------------------------------------------------------------------------------------------------------------------------------------------------------------------------------|--------------------------------------------------------------------------------------------------------------------------------------------------------------------------------------------------------------------------------------------------------------------|-----------------------------------------------------------------------------------------------------------------------------------------------------------|-----------------------------------------------------------------------------------------------------------------------------------------------------|-----------------------------------------------------------------------------------------------------------------------------------------------------------------|--------------------------------------------------------------------------------------------------------------------------------------------------------------------|-------------------------------------------------------------------------------------------------------------------------------------------------------------------------------------------------------------------------------------------------------------------------------------|
| <b>1b. Nom générique</b>                                                                                                                                                                         | <b>2b. Dosage</b><br>[ ][ ][ ][ ] , [ ][ ] mg / [ ][ ][ ][ ] , [ ][ ] mL                                                                                                                                                                                           | <b>3b. Présentation</b><br>3 = Sirop<br>4 = Suspension<br>5 = Liquide injectable<br>6 = Poudre injectable<br>7 = Granule<br>8 = Autre<br>(précisez) _____ | <b>4b. Nom de Marque</b>                                                                                                                            | <b>5b. Fabricant</b>                                                                                                                                            | <b>6b. L'antipaludique est-il expiré?</b><br>1 = Oui<br><br>0 = Non<br><br>99 = Ne sait pas                                                                        | <b>7b. Taille de l'emballage</b><br>(Écrire le nombre <u>et</u> Encercler le type)<br>Il y un total de [ ][ ][ ][ ] mL<br>(ou mg pour les granules et la poudre injectable) dans chaque: (Encercler le type d'emballage):<br>1 = Bouteille<br>2 = Ampoule<br>3 = Sachet de Granules |
|                                                                                                                                                                                                  | [ ][ ][ ][ ] , [ ][ ] mg / [ ][ ][ ][ ] , [ ][ ] mL                                                                                                                                                                                                                |                                                                                                                                                           |                                                                                                                                                     |                                                                                                                                                                 |                                                                                                                                                                    |                                                                                                                                                                                                                                                                                     |
|                                                                                                                                                                                                  | [ ][ ][ ][ ] , [ ][ ] mg / [ ][ ][ ][ ] , [ ][ ] mL<br>(Note : ne pas saisir de mL pour les poudres et les granules)                                                                                                                                               |                                                                                                                                                           |                                                                                                                                                     | <b>5bb. Pays de fabrication</b>                                                                                                                                 |                                                                                                                                                                    |                                                                                                                                                                                                                                                                                     |
| <b>8b. Quantité en stock</b><br>(Écrivez le nombre total de bouteilles ou ampoules ou sachets décrits à la question 7b)<br><br>Il y a [ ][ ][ ][ ][ ] bouteilles ou ampoules ou sachets en stock | <b>9b. Quantité vendue au cours des 7 derniers jours</b><br>(Écrivez le nombre de bouteilles ou ampoules ou sachets décrits à la question 7b)<br><br>Ce point de vente a vendu [ ][ ][ ][ ] bouteilles ou ampoules ou sachets au cours des <u>7 derniers jours</u> | <b>10b. Avez-vous connu une rupture de stock de cet antipaludique au cours des 3 derniers mois?</b><br><br>1 = Oui<br>0 = Non<br>99 = Ne sait pas         | <b>11b. Prix de vente au détail</b><br>[ ][ ] bouteilles ou ampoules ou sachets pour: [ ][ ][ ][ ] FCFA<br><br>(Si gratuit écrire 00000 comme prix) | <b>N2b. Prix de gros</b><br>Achat de gros le plus récent du point de vente :<br>[ ][ ][ ][ ] bouteilles /ampoules/ sachets pour un coût de [ ][ ][ ][ ][ ] FCFA | <b>N2bb. Quantité de gros</b><br>Achat de gros le plus récent du point de vente :<br><br>[ ][ ][ ][ ][ ] bouteilles/ampoules/sachets comme décrits en Q7b) achetés | <b>12b.</b><br>Commentaire                                                                                                                                                                                                                                                          |

|                                                                                                                                                                                                  |                                                                                                                                                                                                                                                                    |                                                                                                                                                           |                                                                                                                                                     |                                                                                                                                                                 |                                                                                                                                                                     |                                                                                                                                                                                                                                                                                     |
|--------------------------------------------------------------------------------------------------------------------------------------------------------------------------------------------------|--------------------------------------------------------------------------------------------------------------------------------------------------------------------------------------------------------------------------------------------------------------------|-----------------------------------------------------------------------------------------------------------------------------------------------------------|-----------------------------------------------------------------------------------------------------------------------------------------------------|-----------------------------------------------------------------------------------------------------------------------------------------------------------------|---------------------------------------------------------------------------------------------------------------------------------------------------------------------|-------------------------------------------------------------------------------------------------------------------------------------------------------------------------------------------------------------------------------------------------------------------------------------|
| <b>1c. Nom générique</b>                                                                                                                                                                         | <b>2c. Dosage</b><br>[ ][ ][ ][ ] , [ ][ ] mg / [ ][ ][ ][ ] , [ ][ ] mL                                                                                                                                                                                           | <b>3c. Présentation</b><br>3 = Sirop<br>4 = Suspension<br>5 = Liquide injectable<br>6 = Poudre injectable<br>7 = Granule<br>8 = Autre<br>(précisez) _____ | <b>4c. Nom de Marque</b>                                                                                                                            | <b>5c. Fabricant</b>                                                                                                                                            | <b>6c. L'antipaludique est-il expiré?</b><br>1 = Oui<br><br>0 = Non<br><br>99 = Ne sait pas                                                                         | <b>7c. Taille de l'emballage</b><br>(Écrire le nombre <u>et</u> Encercler le type)<br>Il y un total de [ ][ ][ ][ ] mL<br>(ou mg pour les granules et la poudre injectable) dans chaque: (Encercler le type d'emballage):<br>1 = Bouteille<br>2 = Ampoule<br>3 = Sachet de Granules |
|                                                                                                                                                                                                  | [ ][ ][ ][ ] , [ ][ ] mg / [ ][ ][ ][ ] , [ ][ ] mL                                                                                                                                                                                                                |                                                                                                                                                           |                                                                                                                                                     |                                                                                                                                                                 |                                                                                                                                                                     |                                                                                                                                                                                                                                                                                     |
|                                                                                                                                                                                                  | [ ][ ][ ][ ] , [ ][ ] mg / [ ][ ][ ][ ] , [ ][ ] mL<br>(Note : ne pas saisir de mL pour les poudres et les granules)                                                                                                                                               |                                                                                                                                                           |                                                                                                                                                     | <b>5cc. Pays de fabrication</b>                                                                                                                                 |                                                                                                                                                                     |                                                                                                                                                                                                                                                                                     |
| <b>8c. Quantité en stock</b><br>(Écrivez le nombre total de bouteilles ou ampoules ou sachets décrits à la question 7c)<br><br>Il y a [ ][ ][ ][ ][ ] bouteilles ou ampoules ou sachets en stock | <b>9c. Quantité vendue au cours des 7 derniers jours</b><br>(Écrivez le nombre de bouteilles ou ampoules ou sachets décrits à la question 7c)<br><br>Ce point de vente a vendu [ ][ ][ ][ ] bouteilles ou ampoules ou sachets au cours des <u>7 derniers jours</u> | <b>10c. Avez-vous connu une rupture de stock de cet antipaludique au cours des 3 derniers mois?</b><br><br>1 = Oui<br>0 = Non<br>99 = Ne sait pas         | <b>11c. Prix de vente au détail</b><br>[ ][ ] bouteilles ou ampoules ou sachets pour: [ ][ ][ ][ ] FCFA<br><br>(Si gratuit écrire 00000 comme prix) | <b>N2c. Prix de gros</b><br>Achat de gros le plus récent du point de vente :<br>[ ][ ][ ][ ] bouteilles /ampoules/ sachets pour un coût de [ ][ ][ ][ ][ ] FCFA | <b>N2cc. Quantité de gros</b><br>Achat de gros le plus récent du point de vente :<br><br>[ ][ ][ ][ ][ ] bouteilles/ampoules/sachets (comme décrits en Q7c) achetés | <b>12c.</b><br>Commentaire                                                                                                                                                                                                                                                          |

13. Y a-t-il des antipaludiques qui sont épuisés aujourd'hui, mais que vous avez eus en stock ces **trois derniers mois** ?  
(entourez une réponse).

1 = Oui                      Allez à la question 13a  
0 = Non                     Allez à la question 14  
99 = Ne sait pas        Allez à la question 14

13a. Comment s'appellent ces antipaludiques ? (*Nous acceptons les noms génériques ou les noms de marque*).

[\_\_\_\_\_]

[\_\_\_\_\_]

[\_\_\_\_\_]

[\_\_\_\_\_]

[\_\_\_\_\_]

99 = Ne sait pas

14. Le dépistage par microscopie du paludisme est-il disponible ici ?

1 = Oui                      Allez à la question 14a  
0 = Non                     Allez à la question 15

14a. Combien le test à la microscopie pour le paludisme coûte-t-il ? *Inscrivez le coût en monnaie locale :*

..... [\_\_|\_\_|\_\_|\_\_|\_\_]FCFA  
00000 = S'il est gratuit  
99999 = Ne sait pas

15. Des kits de dépistage du paludisme sont-ils disponibles ici ? (*Si oui, le répondant doit montrer le kit.*)

1 = Oui                      Allez à la question 15a  
0 = Non                     Allez à la question P1

15a. Combien un test de dépistage du paludisme coûte-t-il ? *Inscrivez le coût en monnaie locale :*

..... [\_\_|\_\_|\_\_|\_\_|\_\_]FCFA  
00000 = Gratuit  
99999 = Ne sait pas

**IV. Questionnaire pour le prestataire**P1. Quelle est votre profession dans ce point de vente ? *(Spontané. Plusieurs réponses possibles)*

- 1 = Pharmacien
- 2 = Médecin
- 3 = Sage femme
- 4 = Infirmier (ère)
- 5 = Laborantin
- 6 = Propriétaire
- 7 = Assistant boutique
- 8 = Parent du propriétaire
- 9 = Autre *(spécifiez)* [ ]

P2. Depuis combien de temps travaillez-vous dans ce point de vente ? *(si moins d'un an, écrivez 01) ...* [ ][ ] ansN3. A part les antipaludiques, quelles autres catégories de médicaments avez-vous en stock ? *(Lisez la liste)*

- 1 = Anti-inflammatoires/antipyrétiques
- 2 = Antihelminthiques (vers)
- 3 = Antibiotiques
- 4 = Fongicides oraux
- 5 = Cardiovasculaires (angine, arythmie, hypertension)
- 6 = Pommades et crèmes (fongicides, acné)
- 7 = Maux gastroentériques (antiacidité, antiémétique, laxatifs, diarrhées)
- 8 = Vitamines et fortifiants
- 9 = Médicaments contre la toux

P3. L'antipaludique que vous avez vendu ou distribué **le plus souvent durant le mois dernier** est-il en stock ?

- 1 = Oui, il est en stock      Demandez à voir physiquement le médicament et utilisez l'emballage pour répondre aux questions P3a-f
- 0 = Non, il n'est pas en stock      Demandez au prestataire de se rappeler autant d'informations que possible pour les questions P3a-f.

Le sondeur doit compléter le tableau ci-dessous à partir des informations qu'il trouvera sur l'emballage du médicament ou à partir des réponses fournies par le prestataire.

| P3a. Nom générique du médicament le plus vendu ce dernier mois<br>99 = Ne sait pas | P3b. Dosage<br>(Inscrire le dosage et les bonnes unités. Note : pas de ml pour les comprimés, les suppositoires, les poudres et les granulés).<br>99 = Ne sait pas | P3c. Présentation<br>(encerclez une réponse)                    | P3d. Nom de la marque<br>99 = Ne sait pas | P3f. Prix de vente au détail<br><br>(si gratuit, écrire 00000, si ne sait pas, écrire 99999) |
|------------------------------------------------------------------------------------|--------------------------------------------------------------------------------------------------------------------------------------------------------------------|-----------------------------------------------------------------|-------------------------------------------|----------------------------------------------------------------------------------------------|
|                                                                                    | [ ][ ][ ][ ] . [ ] mg/<br>[ ][ ][ ][ ] mL                                                                                                                          | 1 = Comprimé<br>2 = Suppositoire<br>3 = Sirop<br>4 = Suspension | P3e. Fabricant<br>99 = Ne sait pas        | [ ][ ] comprimés ou suppositoires pour:<br>[ ][ ][ ][ ][ ] FCFA                              |
|                                                                                    | [ ][ ][ ][ ] . [ ] mg/<br>[ ][ ][ ][ ] mL                                                                                                                          | 5 = Liquide injectable<br>6 = Poudre injectable<br>7 = Granulé  |                                           | OU<br>[ ][ ] bouteilles ou ampoules ou sachets pour:<br>[ ][ ][ ][ ][ ] FCFA                 |
|                                                                                    | [ ][ ][ ][ ] . [ ] mg/<br>[ ][ ][ ][ ] mL                                                                                                                          | 8 = Autre <i>(spécifiez)</i><br>[ ]<br>99 = Ne sait pas         |                                           |                                                                                              |

**N4. Ce dernier mois**, combien de fois vous êtes vous réapprovisionné avec le traitement antipaludique que vous avez vendu ou distribué le plus souvent ? [\_\_|\_\_] fois  
99 = Ne sait pas

P4. A votre avis, quel est le médicament antipaludique le plus efficace ? (*La réponse doit être un nom générique ou un nom de marque. Demandez au prestataire de vous montrer le médicament s'il l'a en stock.*)

Écrire la réponse .....[\_\_\_\_\_] ]  
99 = Ne sait pas

P4a. Le médicament antipaludique est-il en stock ?

- 1 = Oui
- 0 = Non

P5. Quel médicament antipaludique recommandez-vous le plus souvent à vos clients ? (*La réponse doit être un nom générique ou un nom de marque. Demandez au prestataire de vous montrer le médicament s'il l'a en stock.*)

Écrire la réponse .....[\_\_\_\_\_] ]

P5a. Le médicament antipaludique est-il en stock ?

- 1 = Oui
- 0 = Non

P6. Comment décidez-vous généralement des médicaments antipaludiques pour lesquels vous allez vous approvisionner ? (*Réponses assistées. Plusieurs réponses acceptées.*)

- 1 = Les plus rentables
- 2 = Recommandés par le gouvernement
- 3 = Les moins chers
- 4 = Influence de la compagnie pharmaceutique ou du responsable des ventes
- 5 = Demande du consommateur
- 6 = Réputation de la marque
- 7 = Type de présentation
- 8 = Facilement disponible
- 9 = Prescrit le plus souvent par les médecins
- 10 = Autre (*spécifiez*) [\_\_\_\_\_] ]
- 99 = Ne sait pas

P7. Vos clients vous demandent-ils souvent le nom d'un certain médicament antipaludique ? (*Réponses assistées. Une seule réponse acceptée.*)

- 0 = Non, ils demandent qu'on les conseille
- 1 = Oui (*spécifiez l'antipaludique*) [\_\_\_\_\_] ]
- 2 = Non, ils ont souvent une ordonnance
- 99 = Ne sait pas

P8. Décidez-vous généralement quels antipaludiques fournir à vos clients ? (*Réponses assistées. Une seule réponse acceptée.*)

- 0 = Non
- 1 = Oui
- 2 = Non, ils ont une ordonnance
- 99 = Ne sait pas

P9. Environ combien de personnes ont acheté ou ont reçu des antipaludiques ici la semaine dernière ? ...[\_\_|\_\_|\_\_]

P10. (**Ne posez la question qu'aux prestataires des établissements privés**). Ce dernier mois, des clients ont-ils acheté des antipaludiques à crédit ? (**Si le point de vente est un établissement de santé public, allez à la question P11**).

- 1 = Oui                                    Allez à la question P10a
- 0 = Non                                   Allez à la question P11
- 99 = Ne sait pas                      Allez à la question P11

P10a. Ce dernier mois, combien de clients ont acheté des antipaludiques à crédit ? ..... [\_\_|\_\_|\_\_]

999 = Ne sait pas

P10b. Quel type de clients ont acheté des antipaludiques à crédit ? (**Ne pas lire les options. Plusieurs réponses acceptées.**)

- 1 = Clients réguliers
- 2 = Personnel du point de vente
- 3 = Les personnes qui n'ont pas les moyens
- 4 = Les clients avec des enfants malades
- 5 = Les clients connus par le prestataire
- 6 = Autre (**spécifiez**) [\_\_\_\_\_]
- 99 = Ne sait pas

P11. Ce dernier mois, avez-vous ouvert les paquets ou vendu des paquets incomplets aux clients qui n'avaient pas les moyens de s'acheter le paquet entier ?

- 1 = Oui
- 0 = Non
- 99 = Ne sait pas

P12. Veuillez citer le médicament de première intention recommandé par le gouvernement pour traiter une fièvre de paludisme simple.

- 0 = Réponse incorrecte (**spécifiez**) [\_\_\_\_\_]                      Allez à la question P13
- 1 = Artemether-Lumefantrine (AL)                                      Allez à la question P12a
- 2 = Coartem                                                                      Allez à la question P12a
- 99 = Ne sait pas                                                                Allez à la question P13

P12a. Veuillez spécifier le schéma de traitement de première intention recommandé par le gouvernement pour un adulte pour ce médicament. (**Les réponses peuvent être assistées avec les questions « combien de comprimés par jour, pendant combien de jours ? » Ils peuvent donner la réponse en lisant l'emballage, mais n'incitez pas le prestataire à le faire**).

- 0 = Réponse inexacte
- 1 = 4 comprimés matin; 4 comprimés le soir pendant 3 jours
- 99 = Ne sait pas

P12b. Veuillez spécifier le schéma de traitement de première intention recommandé par le gouvernement pour un enfant de deux ans pour ce médicament. (**Les réponses peuvent être assistées avec les questions « combien de comprimés par jour, pendant combien de jours ? » Ils peuvent donner la réponse en lisant l'emballage, mais n'incitez pas le prestataire à le faire**).

- 0 = Réponse inexacte
- 1 = 1 comprimé matin; 1 comprimé le soir pendant 3 jours
- 99 = Ne sait pas

P13. Quels sont les signes que la santé d'un enfant de moins de 5 ans est en danger ? (**Faites comprendre au prestataire que cette question n'est pas spécifique au paludisme. Plusieurs réponses acceptées. Ne pas lire, ni proposer les réponses.**)

- 1 = Convulsions
- 2 = Vomissements
- 3 = Incapable de boire/de prendre le sein
- 4 = Respiration anormale
- 5 = Sommeil excessif/difficultés à se réveiller
- 6 = Mou/incapacité à s'asseoir
- 7 = Inconscient/coma
- 8 = Fièvre/température élevée/corps chaud
- 9 = Autre (**spécifiez**): [\_\_\_\_\_]
- 99 = Ne sait pas

P14. (**Ne posez la question qu'aux prestataires des établissements privés**). Quels signes que la santé d'un enfant de moins de 5 ans est en danger vous pousseraient à envoyer l'enfant à un établissement de santé public ? (**Faites comprendre au prestataire que cette question n'est pas spécifique au paludisme. Si c'est un établissement de santé public, allez à la question P15. Plusieurs réponses acceptées. Ne pas lire, ni proposer les réponses.**)

- 1 = Convulsions
- 2 = Vomissements
- 3 = Incapable de boire/de prendre le sein
- 4 = Respiration anormale
- 5 = Sommeil excessif/difficultés à se réveiller
- 6 = Mou/incapacité à s'asseoir
- 7 = inconscient/coma
- 8 = Fièvre/température élevée/corps chaud
- 9 = Autre (**spécifiez**): [\_\_\_\_\_]
- 99 = Ne sait pas

P15. Le personnel qui travaille ici a-t-il déjà participé à une formation organisée par des ONG ou le gouvernement ces **2 dernières années** ? (**Ne pas inclure la formation scolaire**)

- 1 = Oui
- 0 = Non
- 99 = Ne sait pas

P16. Le propriétaire et vous-même compris, combien de personnes travaillent ici ? (**Si le point de vente a plusieurs pharmacies, notez seulement le nombre d'employés de cette pharmacie**) .....[\_\_|\_\_]

P17. Parmi toutes les personnes qui travaillent ici, combien prescrivent ou distribuent des médicaments ? [\_\_|\_\_]

P18. Parmi les membres du personnel de ce point de vente, quelqu'un a-t-il terminé le primaire ? (**Entourez une réponse**)

- 1 = Oui                      Allez à la question P19
- 0 = Non                     Allez à la question P20
- 99 = Ne sait pas        Allez à la question P20

P19. Parmi les membres du personnel de ce point de vente, quelqu'un a-t-il terminé le secondaire ? (**Entourez une réponse**)

- 1 = Oui
- 0 = Non
- 99 = Ne sait pas

P20. Parmi les membres du personnel de ce point de vente, quelqu'un est-il qualifié dans le domaine de la santé ?

**(Entourez une réponse)**

- |                  |                        |
|------------------|------------------------|
| 1 = Oui          | Allez à la question N5 |
| 0 = Non          | Allez à la question N6 |
| 99 = Ne sait pas | Allez à la question N6 |

**N5.** Parmi les personnes qui travaillent à ce point de vente, combien ont le type de qualifications suivantes liées à la santé ? **(Lisez la liste, notez 00 si aucune)**

| Type de qualification dans le domaine de la santé | Nombre |
|---------------------------------------------------|--------|
| 1. Pharmacien                                     | [ ][ ] |
| 2. Technicien en pharmacie                        | [ ][ ] |
| 3. Assistant en pharmacie                         | [ ][ ] |
| 4. Médecin                                        | [ ][ ] |
| 5. Infirmier(ère)/sage-femme                      | [ ][ ] |
| 6. Clinicien                                      | [ ][ ] |
| 7. Autre ( <i>spécifiez</i> ) : _____             | [ ][ ] |

## **SOURCE D'APPROVISIONNEMENT EN ANTIPALUDIQUES**

**N6.** Ces trois derniers mois, à combien de fournisseurs avez-vous acheté vos antipaludiques ou des kits de test de dépistage du paludisme ? [ ][ ]

**(Si un ou plusieurs fournisseurs, notez le nombre puis allez à la question P21)**

- |                                               |                                                  |
|-----------------------------------------------|--------------------------------------------------|
| 00= Aucun fournisseur ces trois derniers mois | <b>Allez à la question P22 - Type de Licence</b> |
| 88= Refuse de répondre                        | <b>Allez à la question P22 - Type de Licence</b> |
| 99 = Ne sait pas                              | <b>Allez à la question P22 - Type de Licence</b> |

P21. Ces trois derniers mois, chez qui avez-vous obtenu ou acheté des médicaments antipaludiques ? **(Veuillez fournir les deux endroits où ce point de vente achète le plus souvent des antipaludiques).**

**Première source :**

P21a. Type de fournisseur (**Réponses assistées. Une seule réponse**) :

- 1 = Grossiste général
- 2 = Grossiste pharmaceutique
- 3 = Pharmacie formelle (enregistrée)
- 4 = Boutique informelle
- 5 = Distributeur pharmaceutique de gros
- 6 = Usine pharmaceutique
- 7 = Autre (spécifiez): ..... [\_\_\_\_\_]
- 8 = Dépôts médicaux gouvernementaux
- 9 = Fournisseurs non-gouvernementaux (ONG ou organisations religieuses)
- 88 = Refuse de répondre
- 99 = Ne sait pas

P21b. Nom du commerce : ..... [\_\_\_\_\_]  
88 = Refuse de répondre 99 = Ne sait pas

P21c. Ville : [\_\_\_\_\_]  
88 = Refuse de répondre 99 = Ne sait pas

P21d. Adresse physique ou identifiants du lieu :

[ ]

88 = Refuse de répondre

99 = Ne sait pas

P21e. Numéro de téléphone : .....

[ ]

88 = Refuse de répondre

99 = Ne sait pas

P21f. Comment recevez-vous les antipaludiques de la part du fournisseur ? (**Réponses assistées. Une seule réponse acceptée**)

1 = Le fournisseur vous les livre

2 = Vous allez les chercher auprès du fournisseur

3 = Les deux

88 = Refuse de répondre

99 = Ne sait pas

P21g. Est-ce un fournisseur de kits de test de dépistage du paludisme ? (**Ne pas demander si le prestataire a répondu « Non » à la question 15. Sélectionnez : « 82 = Non applicable ».**)

1 = Oui

0 = Non

82 = Non applicable

99 = Ne sait pas

**Deuxième source :**

P21h. Type de fournisseur (**Réponses assistées. Une seule réponse acceptée.**):

1 = Grossiste général

2 = Grossiste pharmaceutique

3 = Pharmacie formelle (enregistrée)

4 = Boutique informelle

5 = Distributeur pharmaceutique de gros

6 = Usine pharmaceutique

7 = Autre (spécifiez): ..... [ ]

8 = Dépôts médicaux gouvernementaux

9 = Fournisseurs non-gouvernementaux (ONG ou organisations religieuses)

88 = Refuse de répondre

99 = Ne sait pas

P21i. Nom du commerce : .....

[ ]

88 = Refuse de répondre

99 = Ne sait pas

P21j. Ville :

[ ]

88 = Refuse de répondre

99 = Ne sait pas

P21k. Adresse physique ou identifiants du lieu :

[ ]

88 = Refuse de répondre

99 = Ne sait pas

P21l. Numéro de téléphone : .....

[ ]

88 = Refuse de répondre

99 = Ne sait pas

P21m. Comment recevez-vous les antipaludiques de la part du fournisseur ? (**Réponses assistées. Une seule réponse acceptée**)

- 1 = Le fournisseur vous les livre
- 2 = Vous allez les chercher auprès du fournisseur
- 3 = Les deux
- 88 = Refuse de répondre
- 99 = Ne sait pas

P21n. Est-ce un fournisseur de kits de test de dépistage du paludisme ? (**Ne pas demander si le prestataire a répondu « Non » à la question 15. Sélectionnez : « 82 = Non applicable ».**)

- 1 = Oui
- 0 = Non
- 82 = Non applicable
- 99 = Ne sait pas

## TYPE DE LICENCE

P22. Avez-vous une licence de pharmacie, de clinique, d'ONG ou d'établissement missionnaire ? (**Si établissement de santé public, sélectionnez « 82 = Non applicable »**)

- |                     |                         |
|---------------------|-------------------------|
| 1 = Oui             | Allez à la question P23 |
| 0 = Non             | Allez à la question P23 |
| 82 = Non applicable | Allez à la question P24 |

P23. Avez-vous d'autres types de licence ?

- |         |                          |
|---------|--------------------------|
| 1 = Oui | Allez à la question P23a |
| 0 = Non | Allez à la question P24  |

P23a. Quel type de licence ? (**Entourez toutes les réponses qui s'appliquent**)

- 1 = Établissement
- 2 = Laboratoire
- 3 = Autre (**spécifiez**) : [\_\_\_\_\_]

## OBSERVATIONS

P24. Avez-vous vu la licence de pharmacie, de clinique, d'ONG ou d'établissement missionnaire ? (**Si c'est un établissement de santé public, sélectionnez « 82 = Non applicable »**)

- 1 = Confirmez que vous avez vu le diplôme
- 0 = Vous n'avez pas vu le diplôme
- 82 = Non applicable

P25. Les médicaments sont-ils stockés dans un endroit sec ?

- 1 = Oui, dans un endroit sec
- 0 = Non, ils ne sont pas stockés dans un endroit sec

P26. Les médicaments sont-ils protégés de la lumière du soleil ?

- 1 = Oui, ils sont protégés du soleil
- 0 = Non, ils ne sont pas protégés du soleil

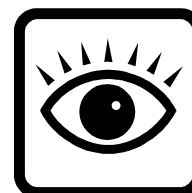

P27. Les médicaments sont-ils stockés sur le sol ?

1 = Oui, ils sont sur le sol

0 = Non, ils ne sont pas sur le sol

**X2. Commentaires (si vous en avez)**

**FIN DE L'ENTRETIEN.** Remerciez le prestataire pour sa participation à l'audit. Retournez à la question C10 pour enregistrer le statut final de l'entretien et l'heure à laquelle il s'est terminé.
